# Supplementary material for: Predicting chemotherapeutic drug combinations through gene network profiling
Source: PubMed Central journal article supplement (PMC4726371; doi:10.1038/srep18658), 2016-01-21
Supplement: srep18658-s1.pdf [file srep18658-s1.pdf]

**Supplementary Information**  
**(11 Figures and 1 supplementary method)**

**Predicting chemotherapeutic drug combinations through gene network profiling**

Thi Thuy Trang Nguyen<sup>1,2</sup>, Jacqueline Kia Kee Chua<sup>1,8</sup>, Kwi Shan Seah<sup>1,2</sup>, Seok Hwee Koo<sup>5,10</sup>, Jie Yin Yee<sup>2,5</sup>, Eugene Guorong Yang<sup>6</sup>, Kim Kiat Lim<sup>1,2</sup>, Shermaine Yu Wen Pang<sup>1</sup>, Audrey Yuen<sup>9</sup>, Louxin Zhang<sup>7</sup>, Wee Han Ang<sup>4,8</sup>, Brian Dymock<sup>6</sup>, Edmund Jon Deoon Lee<sup>2,5</sup>  
and Ee Sin Chen<sup>1,2,3,4,\*</sup>

<sup>1</sup>Department of Biochemistry, National University of Singapore, Singapore, <sup>2</sup>National University Health System (NUHS), Singapore, <sup>3</sup>Synthetic Biology Research Consortium, National University of Singapore, <sup>4</sup>NUS Graduate School for Integrative Sciences and Engineering, <sup>5</sup>Department of Pharmacology, <sup>6</sup>Department of Pharmacy, <sup>7</sup>Department of Mathematics, <sup>8</sup>Department of Chemistry, Faculty of Science, National University of Singapore, Singapore, <sup>9</sup>School of Chemical and Life Sciences, Singapore Polytechnic, Singapore, <sup>10</sup>Changi General Hospital, Ministry of Health, Singapore

\*Corresponding author Email: [bchces@nus.edu.sg](mailto:bchces@nus.edu.sg)

## **Supplementary Figures and Supplementary Method**

**Supplementary Figure 1** Spotting of doxorubicin resistance (DXR) strains obtained with indicated concentrations of hydroxyurea (HU).

**Supplementary Figure 2** Spotting of doxorubicin resistance (DXR) strains obtained with indicated concentrations of methyl methanesulfonate (MMS).

**Supplementary Figure 3** Spotting of doxorubicin resistance (DXR) strains obtained with indicated concentrations of camptothecin (CPT).

**Supplementary Figure 4** Spotting of doxorubicin resistance (DXR) strains obtained with indicated concentrations of thiabendazole (TBZ).

**Supplementary Figure 5** Spotting of doxorubicin resistance (DXR) strains obtained with indicated concentrations of cisplatin.

**Supplementary Figure 6** Spotting of doxorubicin resistance (DXR) strains obtained with indicated concentration of suberoylanilide hydroxamic acid (SAHA).

**Supplementary Figure 7** Derivation of sensitivity scores (*s*-scores) from cell growth phenotypes grown on a series of drug concentrations. **(a)** Quantitation of the fold sensitivity from the 10-fold serially diluted drug plates. **(b)** Formula expressing the logarithmic transformation of the mean fold sensitivity relative to the growth of cells on non-drug-treated plates. **(c)** Schematic representation of the interpretation of the *s*-score values. A value of 0 is taken as no sensitivity, a negative *s*-score represents hypersensitivity, and a positive value means resistance.

**Supplementary Figure 8** Serial dilution of wild-type (WT) prototrophic fission yeast strains of mating type *h*<sup>+</sup> (975) and *h*<sup>-</sup> (972) on 0, 15, 30, 75 µg/ml doxorubicin alone or in conjunction with 0.01% methyl methanesulfonate (MMS), 8 µg/ml thiabendazole (TBZ), 2

mM hydroxyurea (HU), 8  $\mu$ M camptothecin (CPT), 1.2 mM cisplatin, 5 mM suberoylanilide hydroxamic acid (SAHA) or with 1.2 mM cisplatin and 5 mM SAHA. These concentrations were selected as they did not significantly reduce WT cell viability. Cell growth was assessed on days 3 and 7 after spotting onto drug plates.

**Supplementary Figure 9** DXR mutants exhibit hypersensitivity towards the triple combination of cisplatin, SAHA and doxorubicin. WT,  *$\Delta$ rhp51*,  *$\Delta$ rav1*,  *$\Delta$ vps35*,  *$\Delta$ caf1* and  *$\Delta$ tim11* were 10-fold serially diluted and spotted onto media containing 0, 15, 30, 75  $\mu$ g/ml doxorubicin alone or in combination with 1.2 mM cisplatin, 5 mM suberoylanilide hydroxamic acid (SAHA). Cell growth was analyzed on days 3 and 7 after drug treatment.

**Supplementary Figure 10** Sensitization of human cervical carcinoma (HeLa) cells to doxorubicin via concurrent treatment with cisplatin and suberoylanilide hydroxamic acid (SAHA). (a) Cells were co-treated with varying concentrations of cisplatin (halving dilutions from 100  $\mu$ M to 0) in the presence of 10, 15, or 25  $\mu$ M SAHA, or 0.1, 1 or 5  $\mu$ M doxorubicin or with a triple combination (10  $\mu$ M SAHA constant). (b) Dose response effect on the viability of HeLa cells was analyzed following treatment with varying concentrations of cisplatin alone (blue), in combination with 0.1  $\mu$ M doxorubicin (green) or 10  $\mu$ M SAHA (red), or 0.1  $\mu$ M doxorubicin and 5  $\mu$ M SAHA (purple). (c) Similar to (b) except 1  $\mu$ M doxorubicin was used.

**Supplementary Figure 11** Human non-cancerous embryonic kidney (HEK293) cells did not show cumulative cell killing in triple combination of doxorubicin, cisplatin and suberoylanilide hydroxamic acid (SAHA). (a) Cells were co-treated with varying concentrations of cisplatin (halving dilutions from 100  $\mu$ M to 0) in the presence of 5, 50, 100  $\mu$ M SAHA, or 0.06, 0.15 or 1  $\mu$ M doxorubicin or with a triple combination (5  $\mu$ M SAHA constant). (b) Dose response effect on viability of HEK293 cells were analyzed after treating

with varying concentrations of cisplatin alone (blue), in combination with 0.1  $\mu\text{M}$  doxorubicin (green) or 10  $\mu\text{M}$  SAHA (red), or 0.06  $\mu\text{M}$  doxorubicin and 5  $\mu\text{M}$  SAHA (purple). (c) Similar to (b) except 0.15  $\mu\text{M}$  doxorubicin was used.

**Supplementary Materials and Methods** Chemical synthesis of SAHA

# Supplementary Figure 1

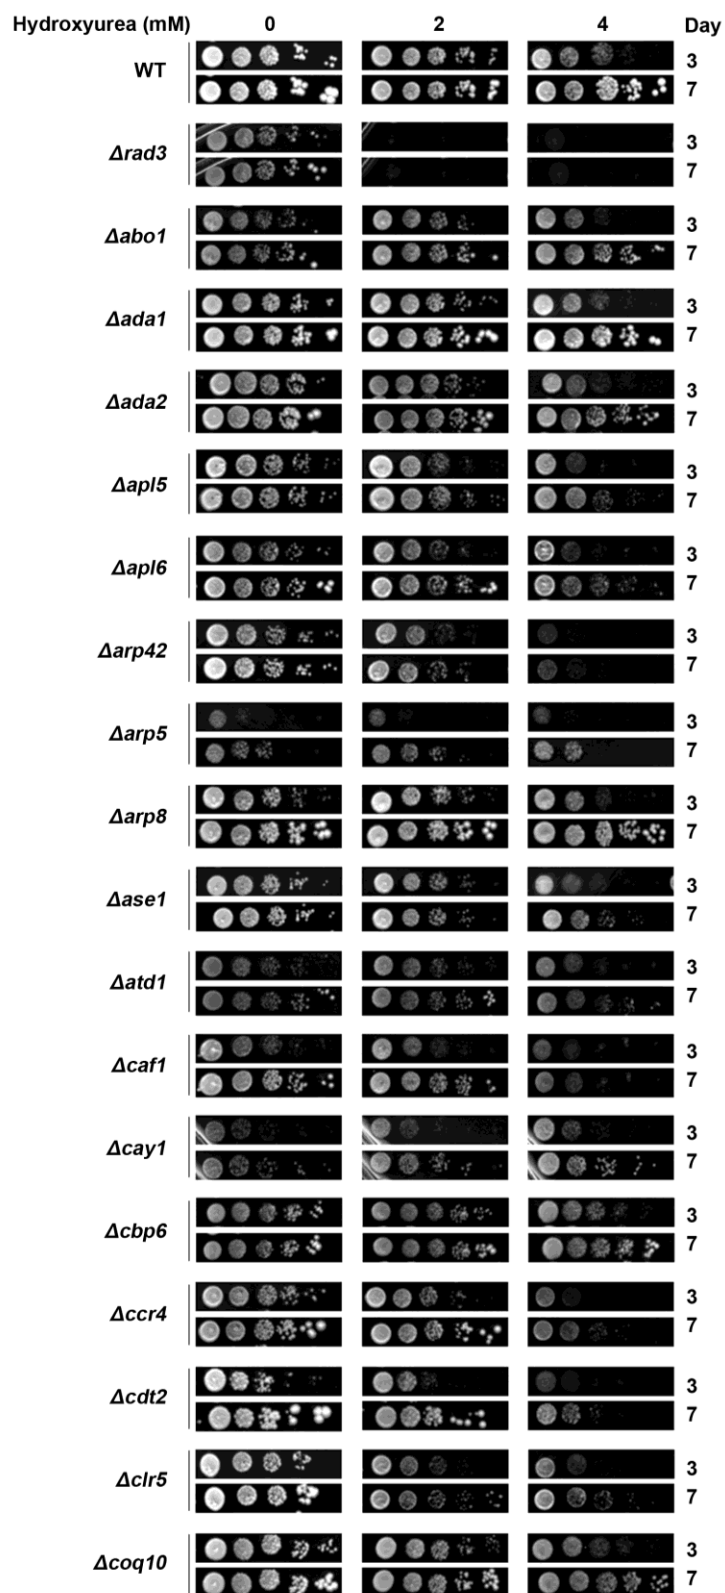

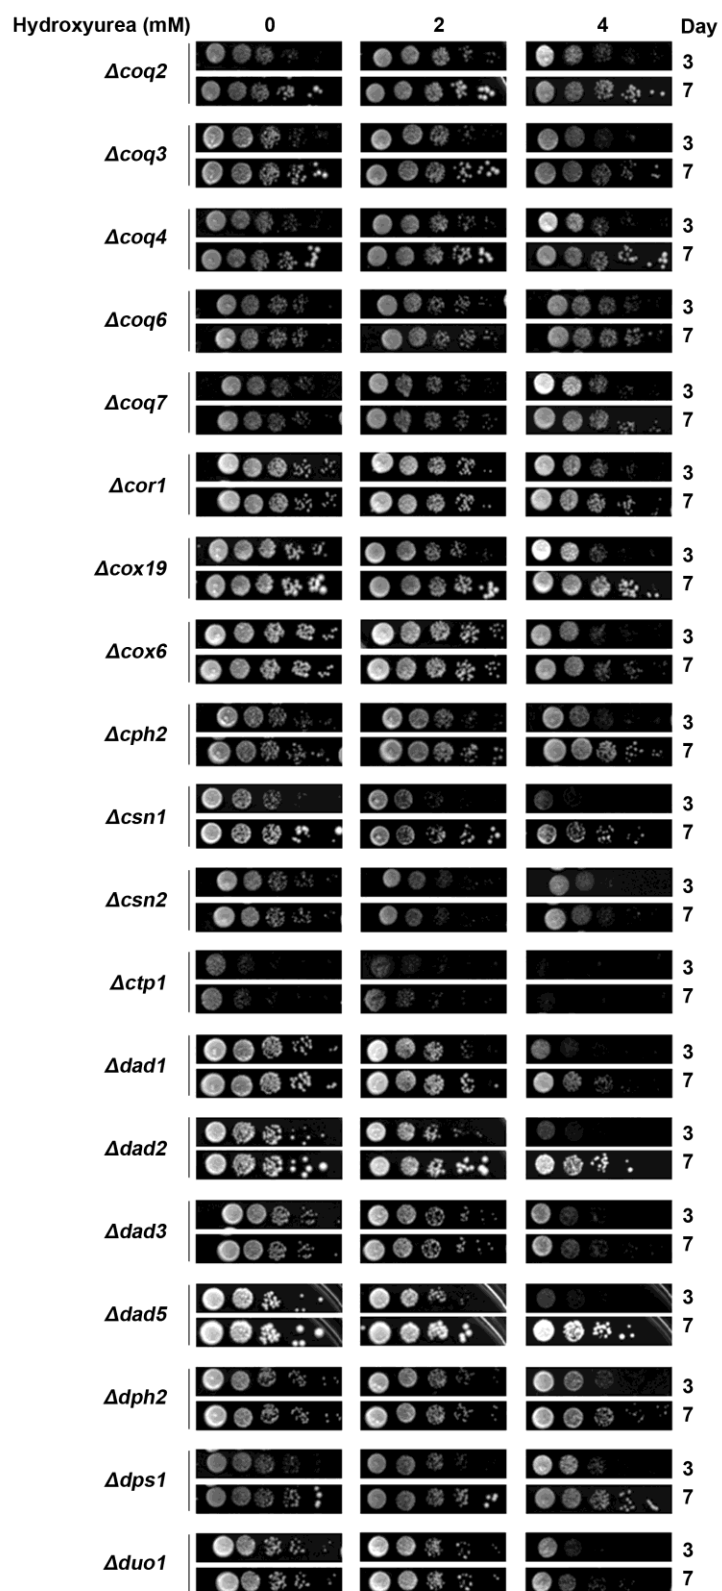

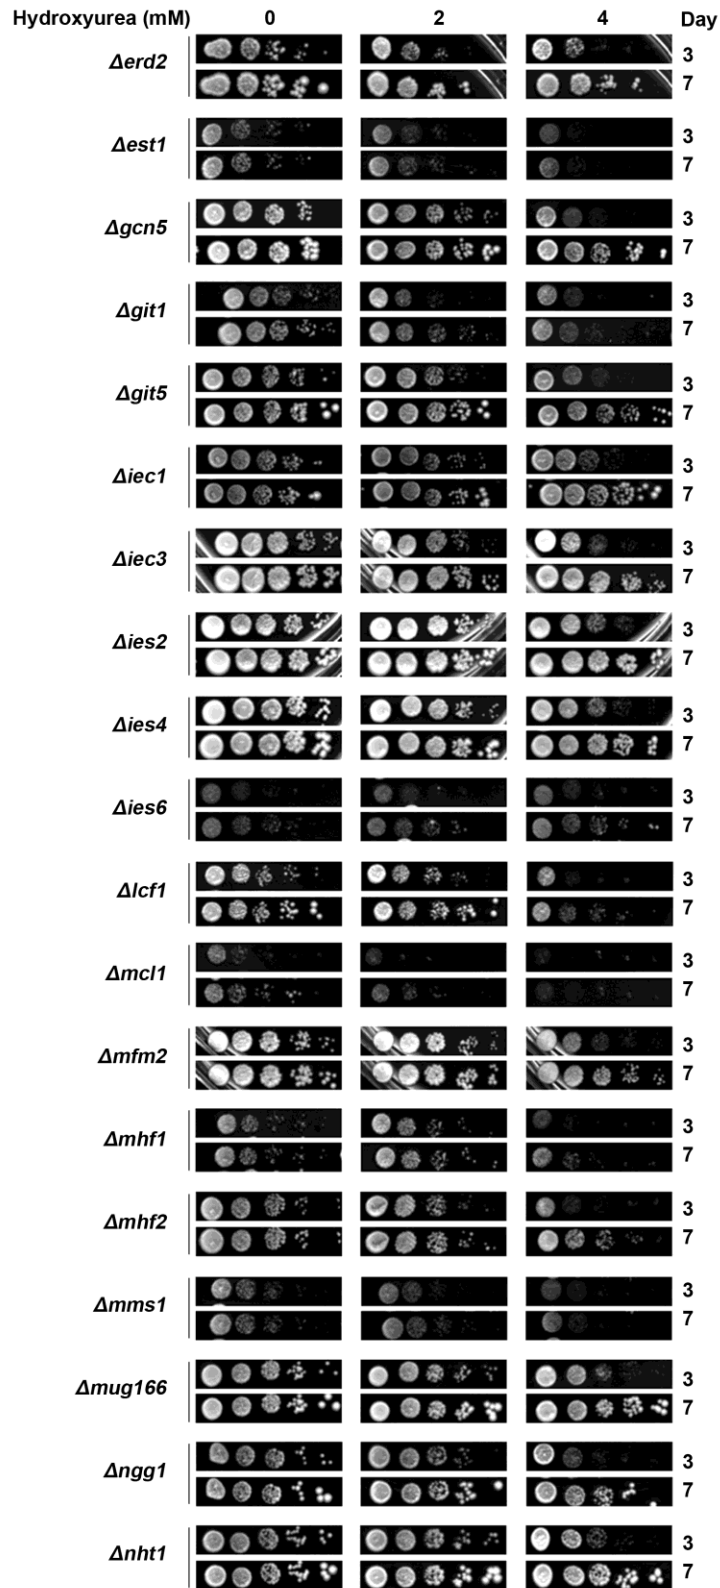

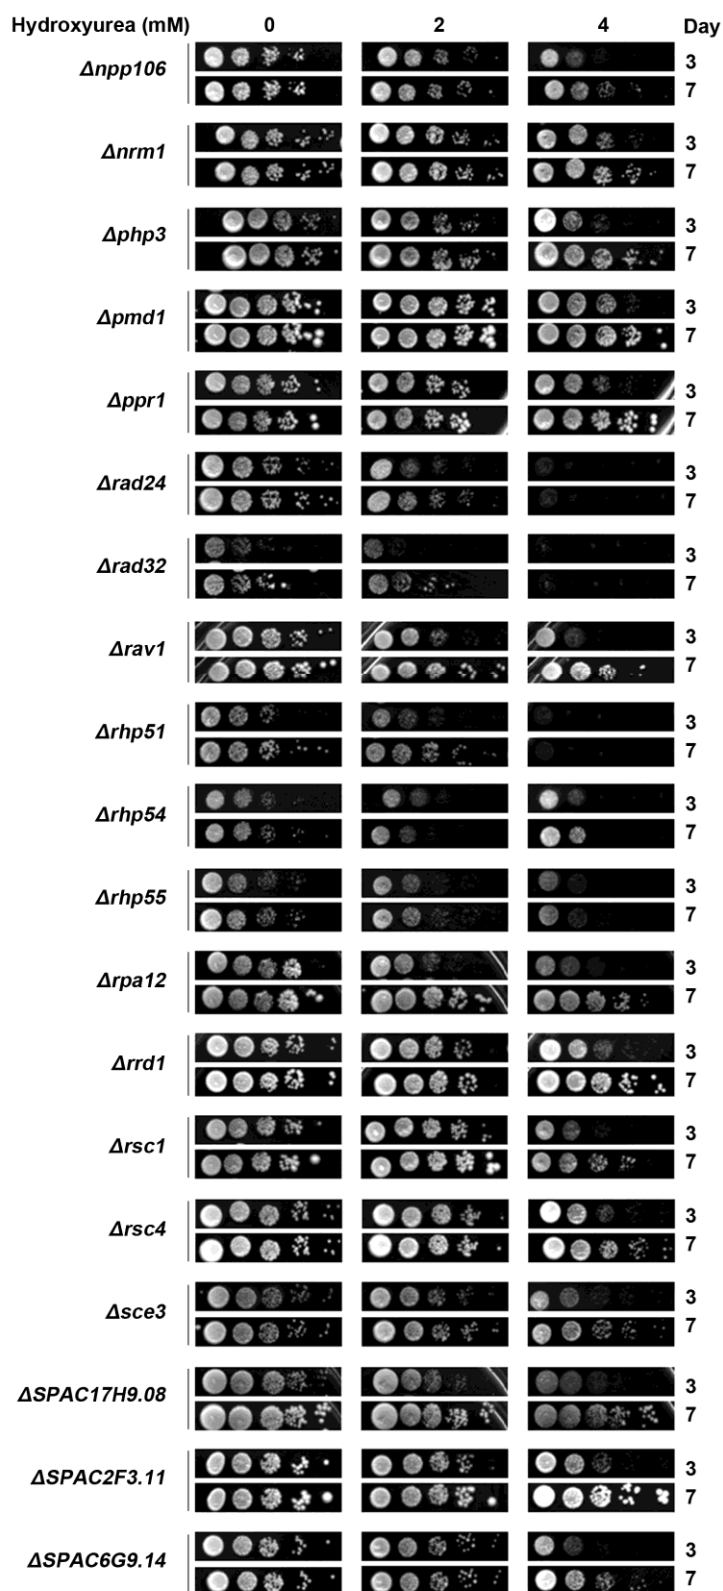



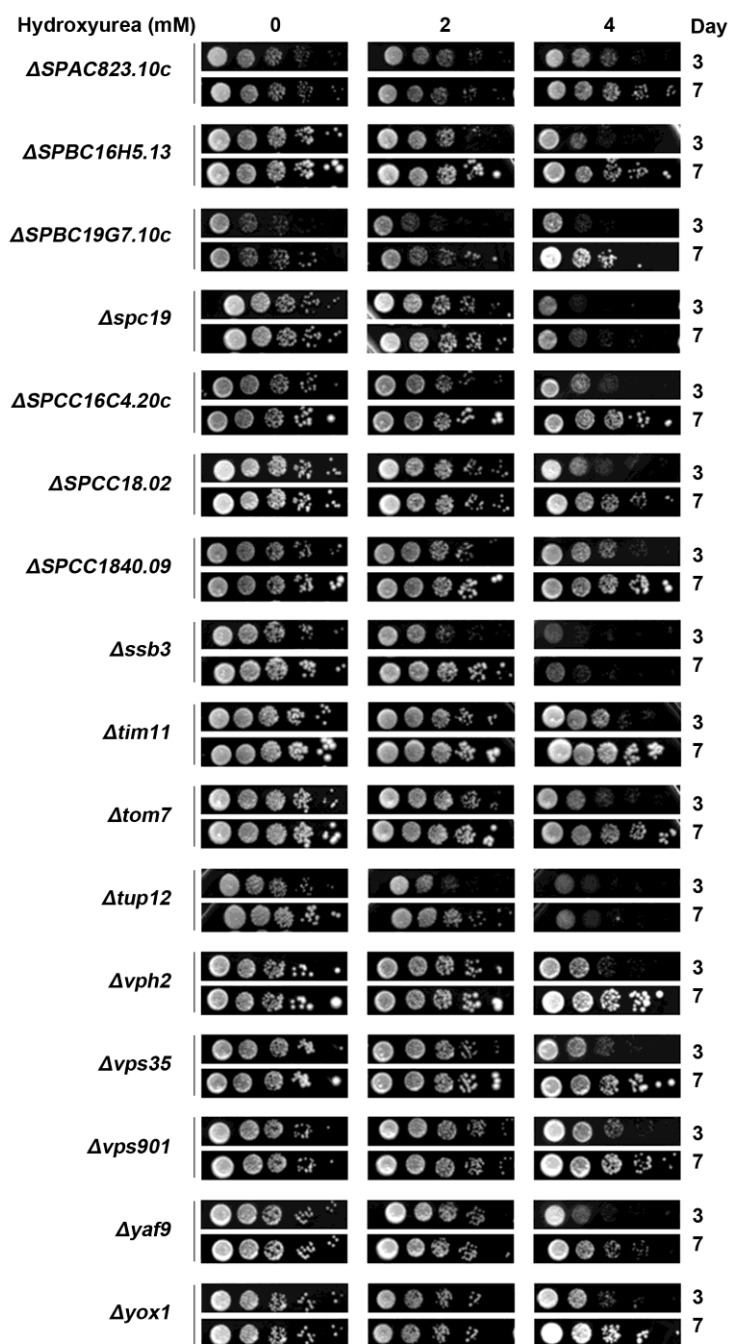

## Supplementary Figure 2

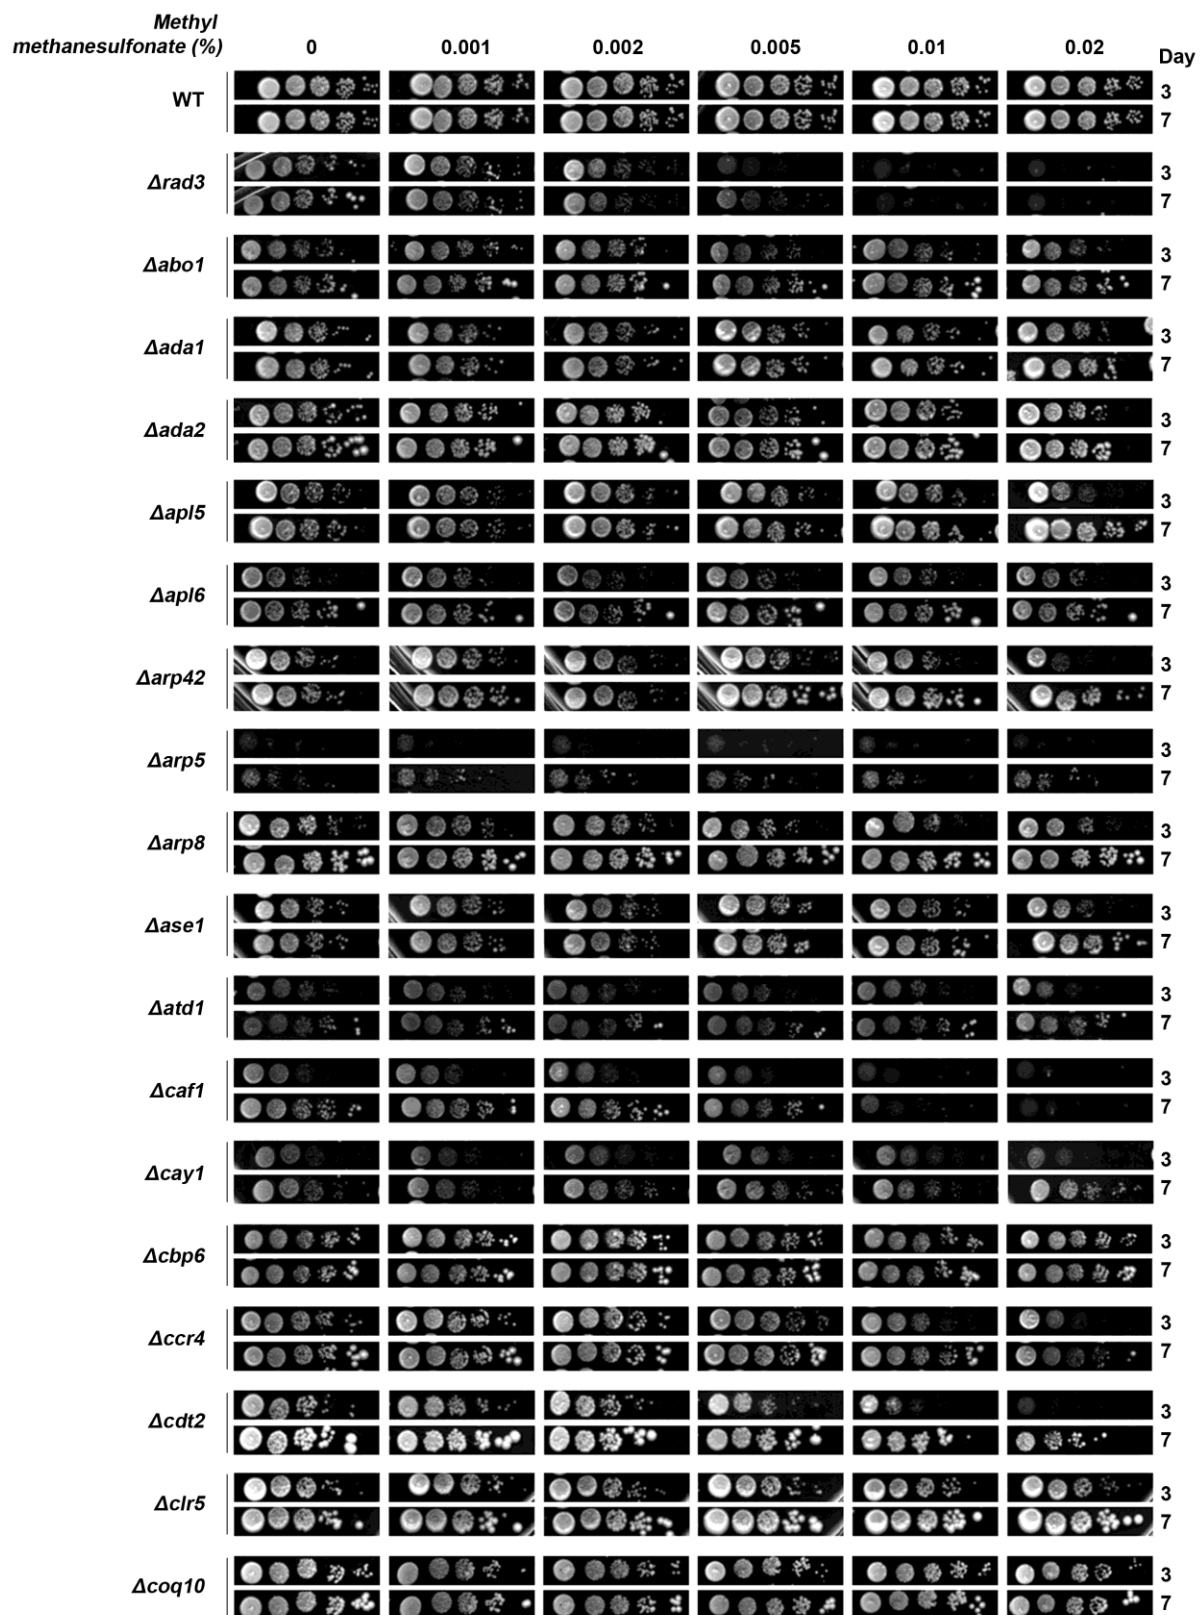

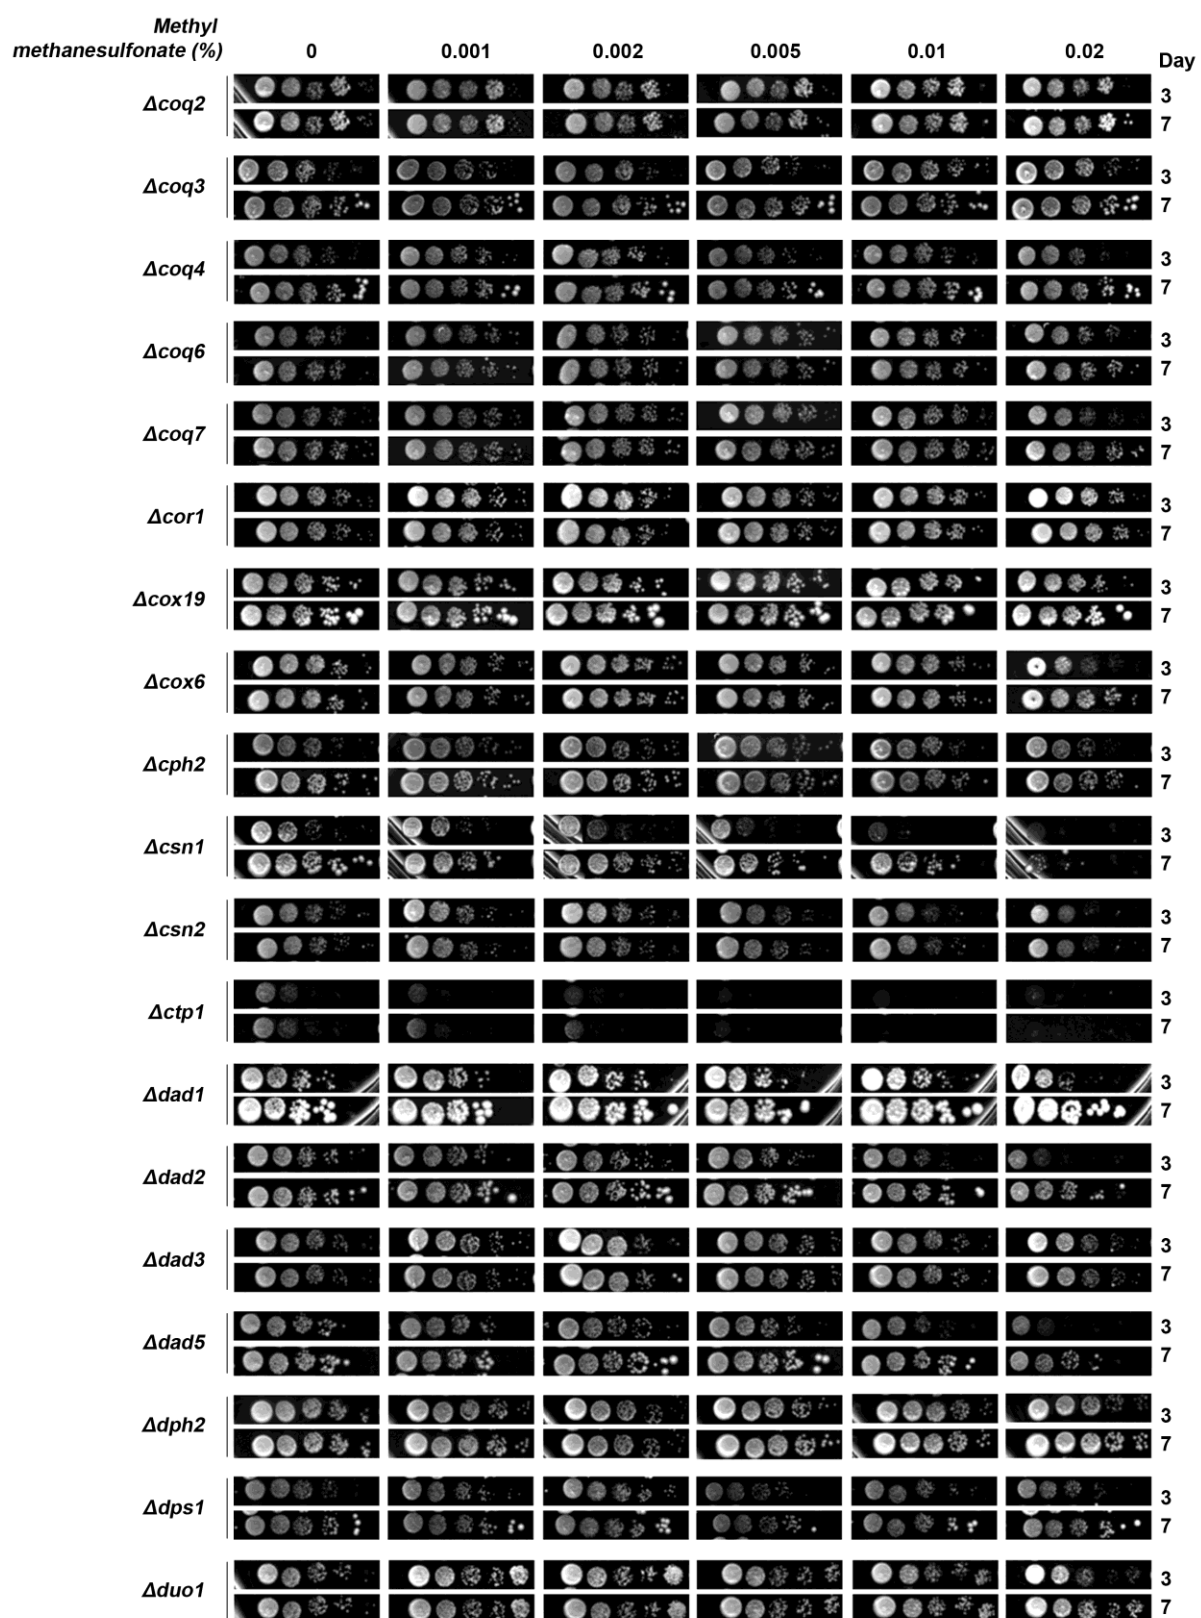

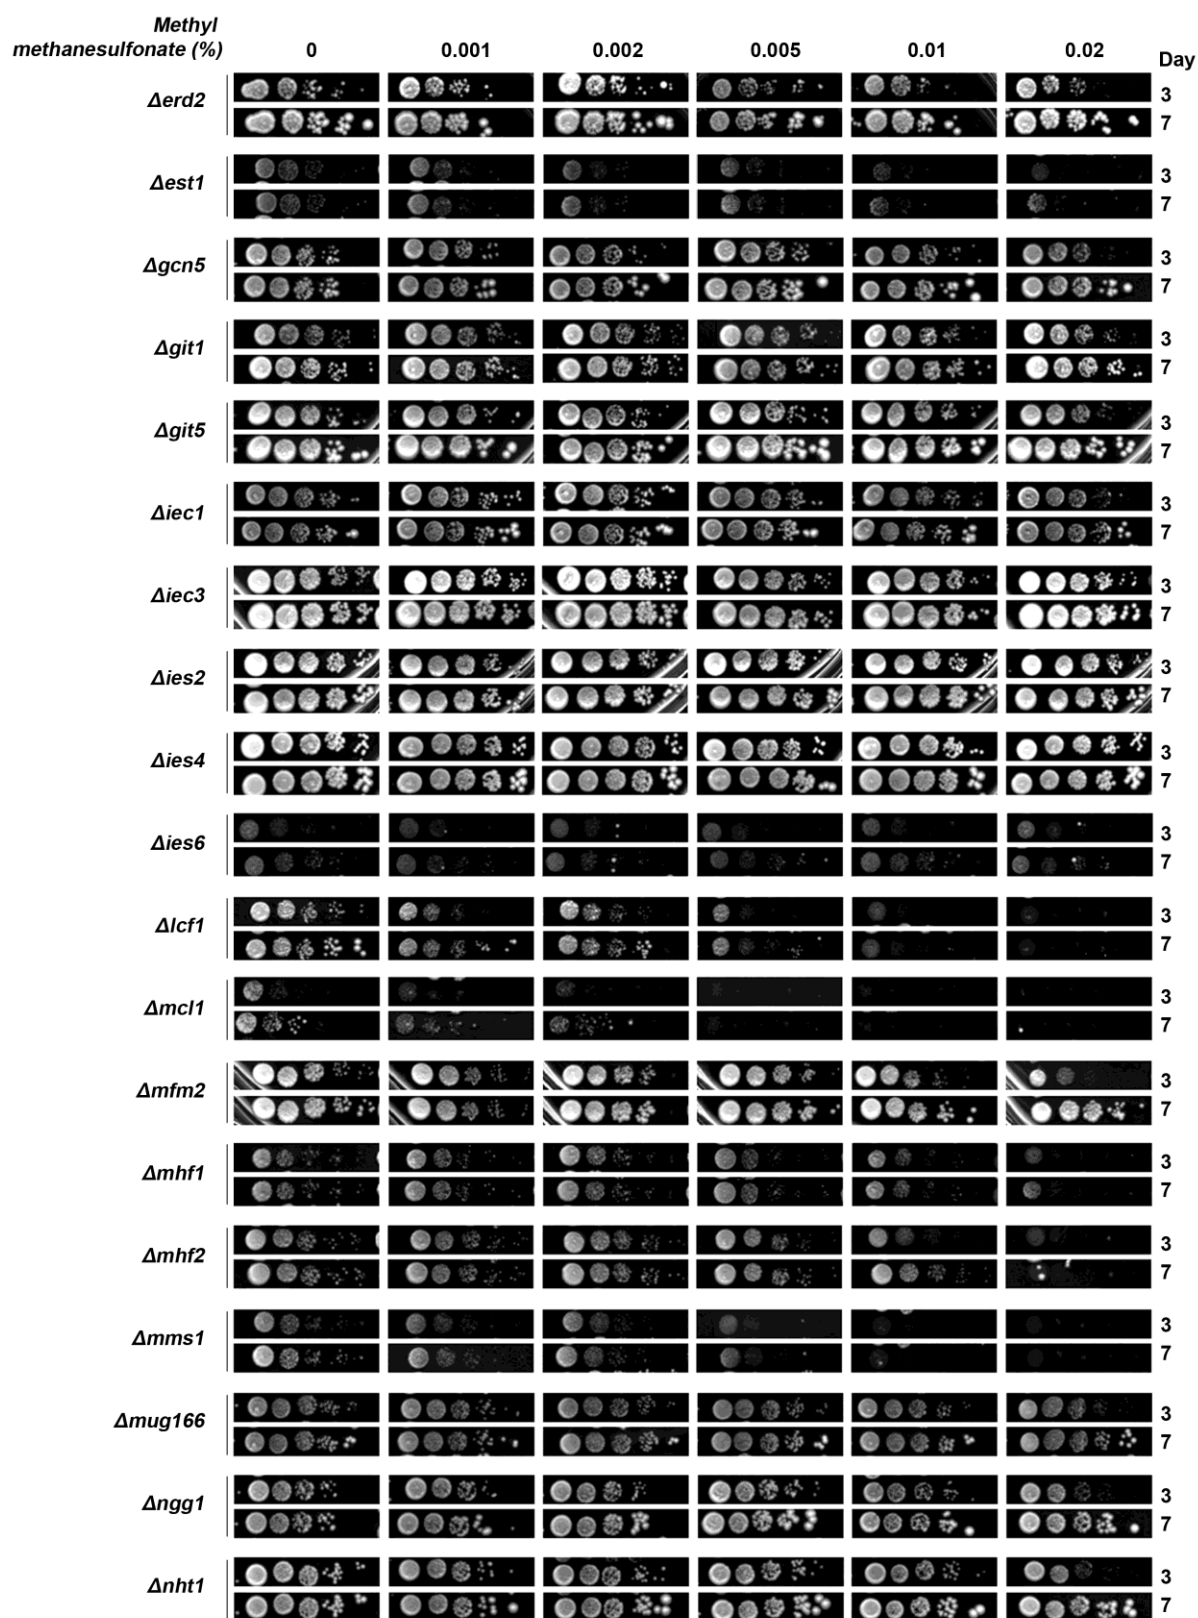

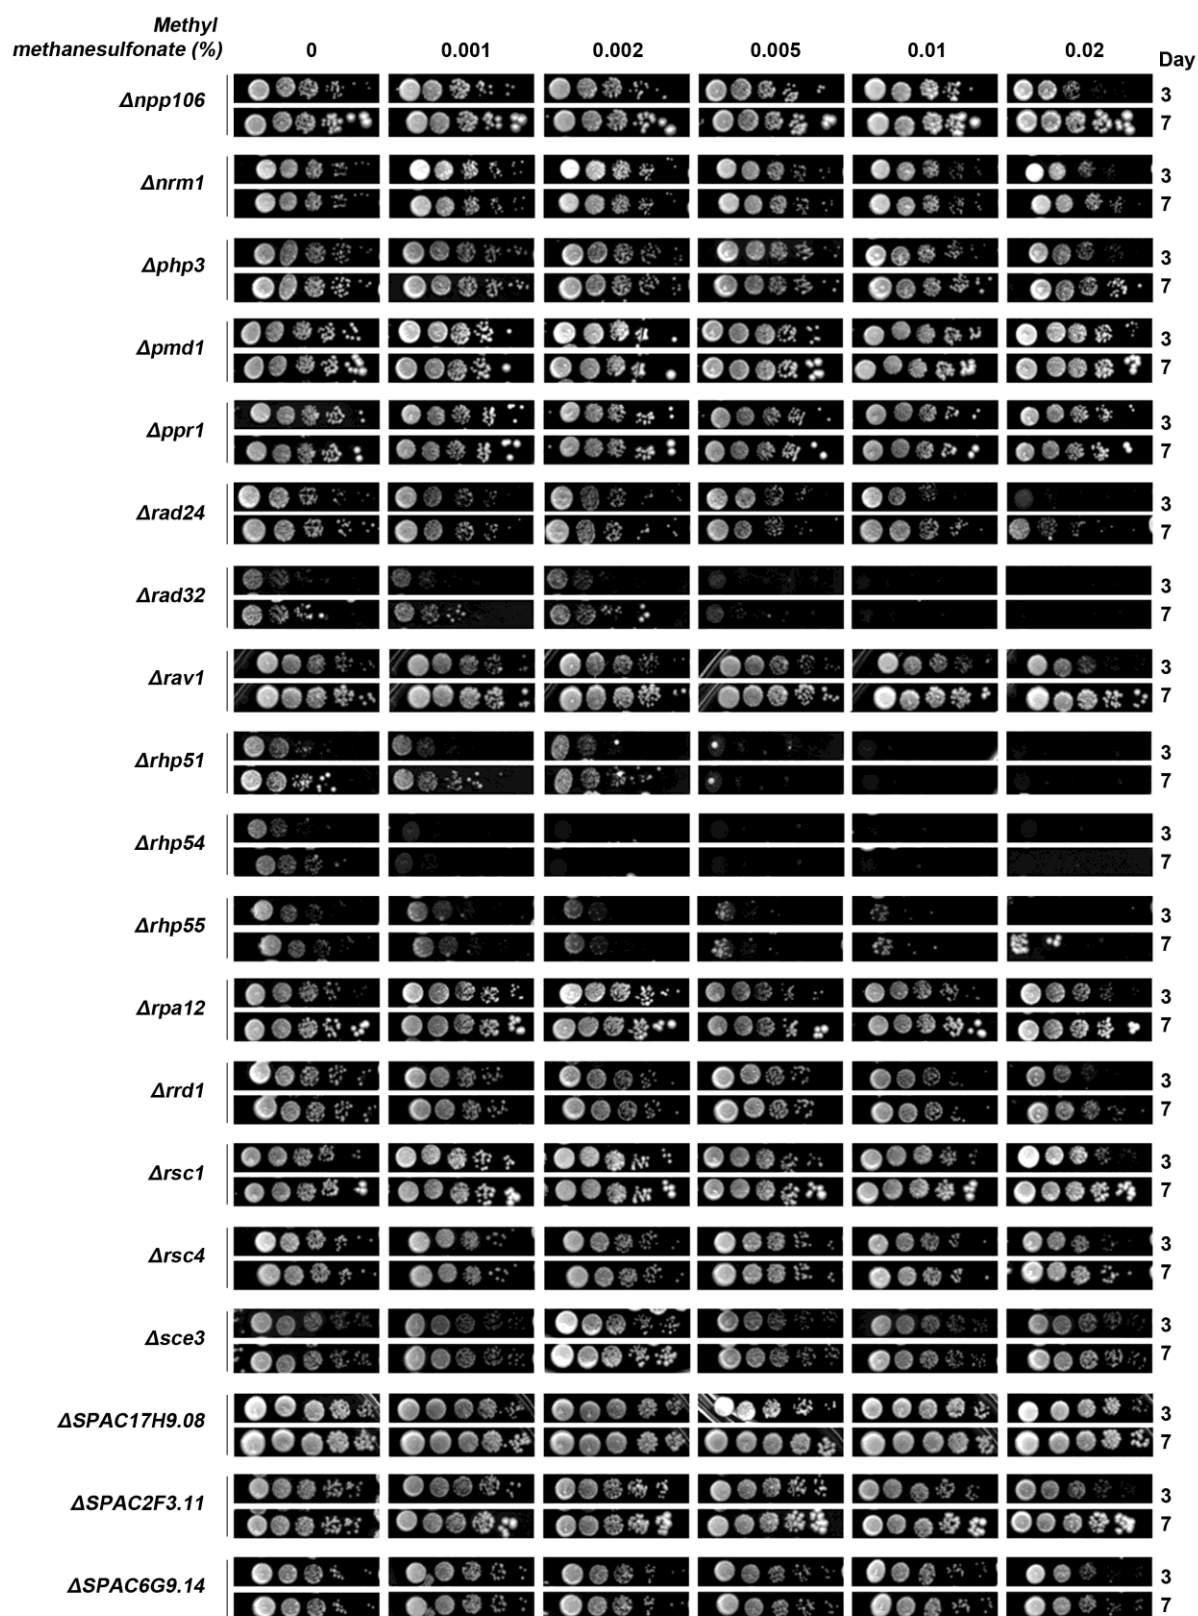

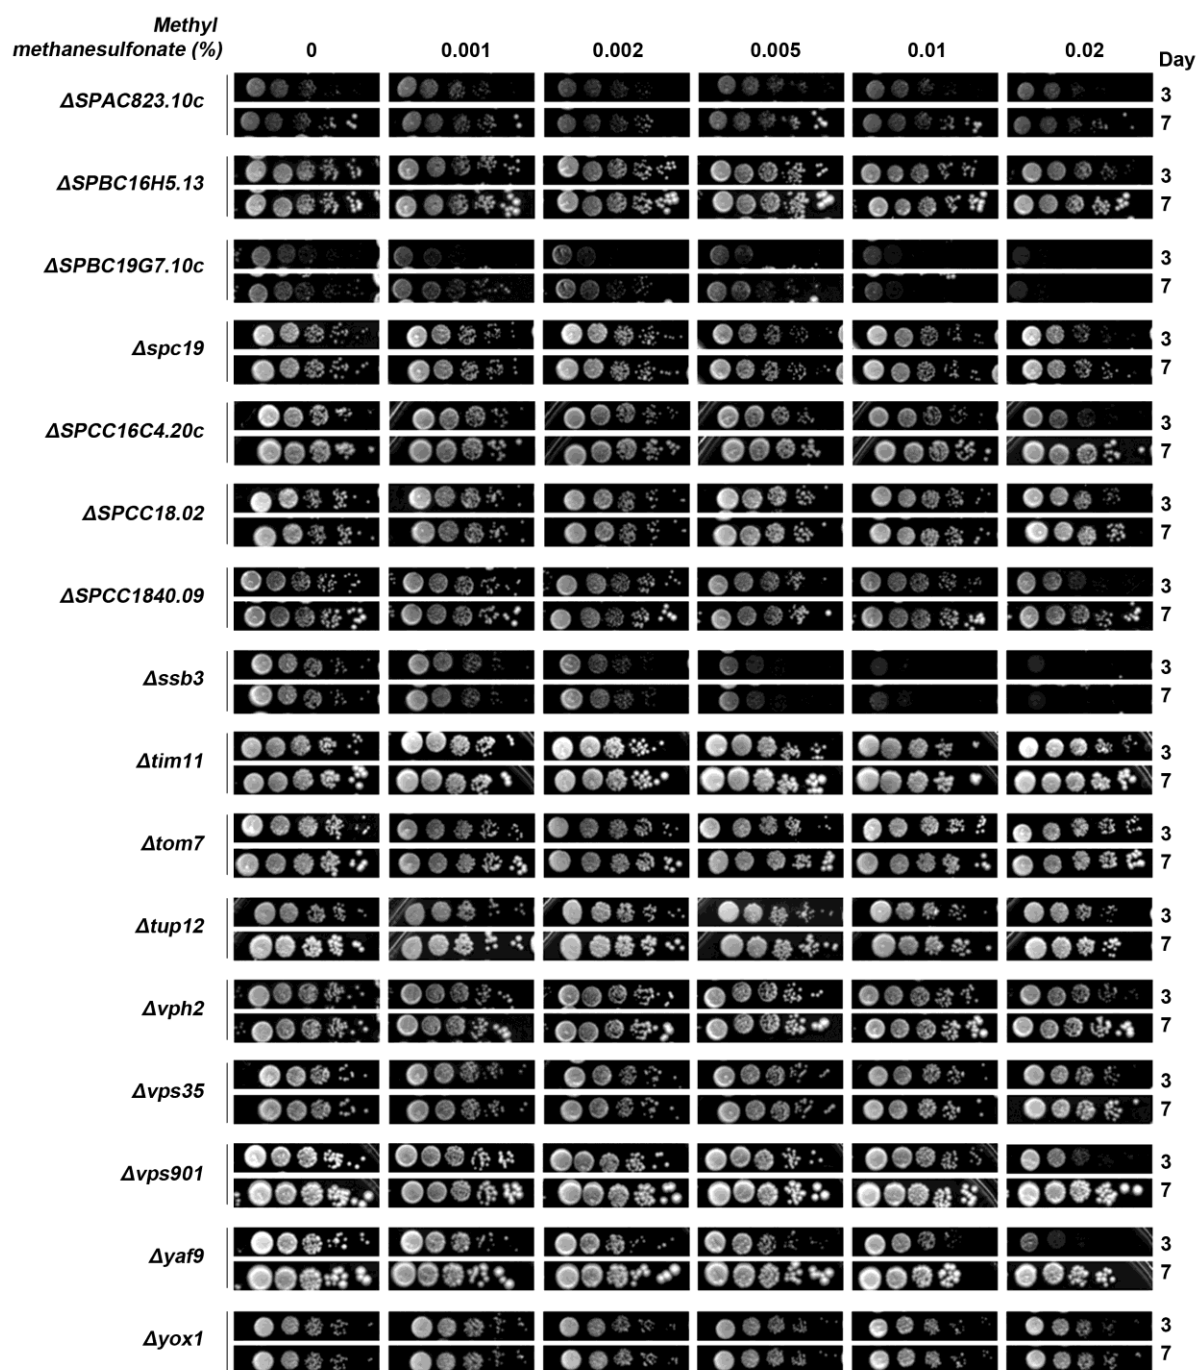

### Supplementary Figure 3

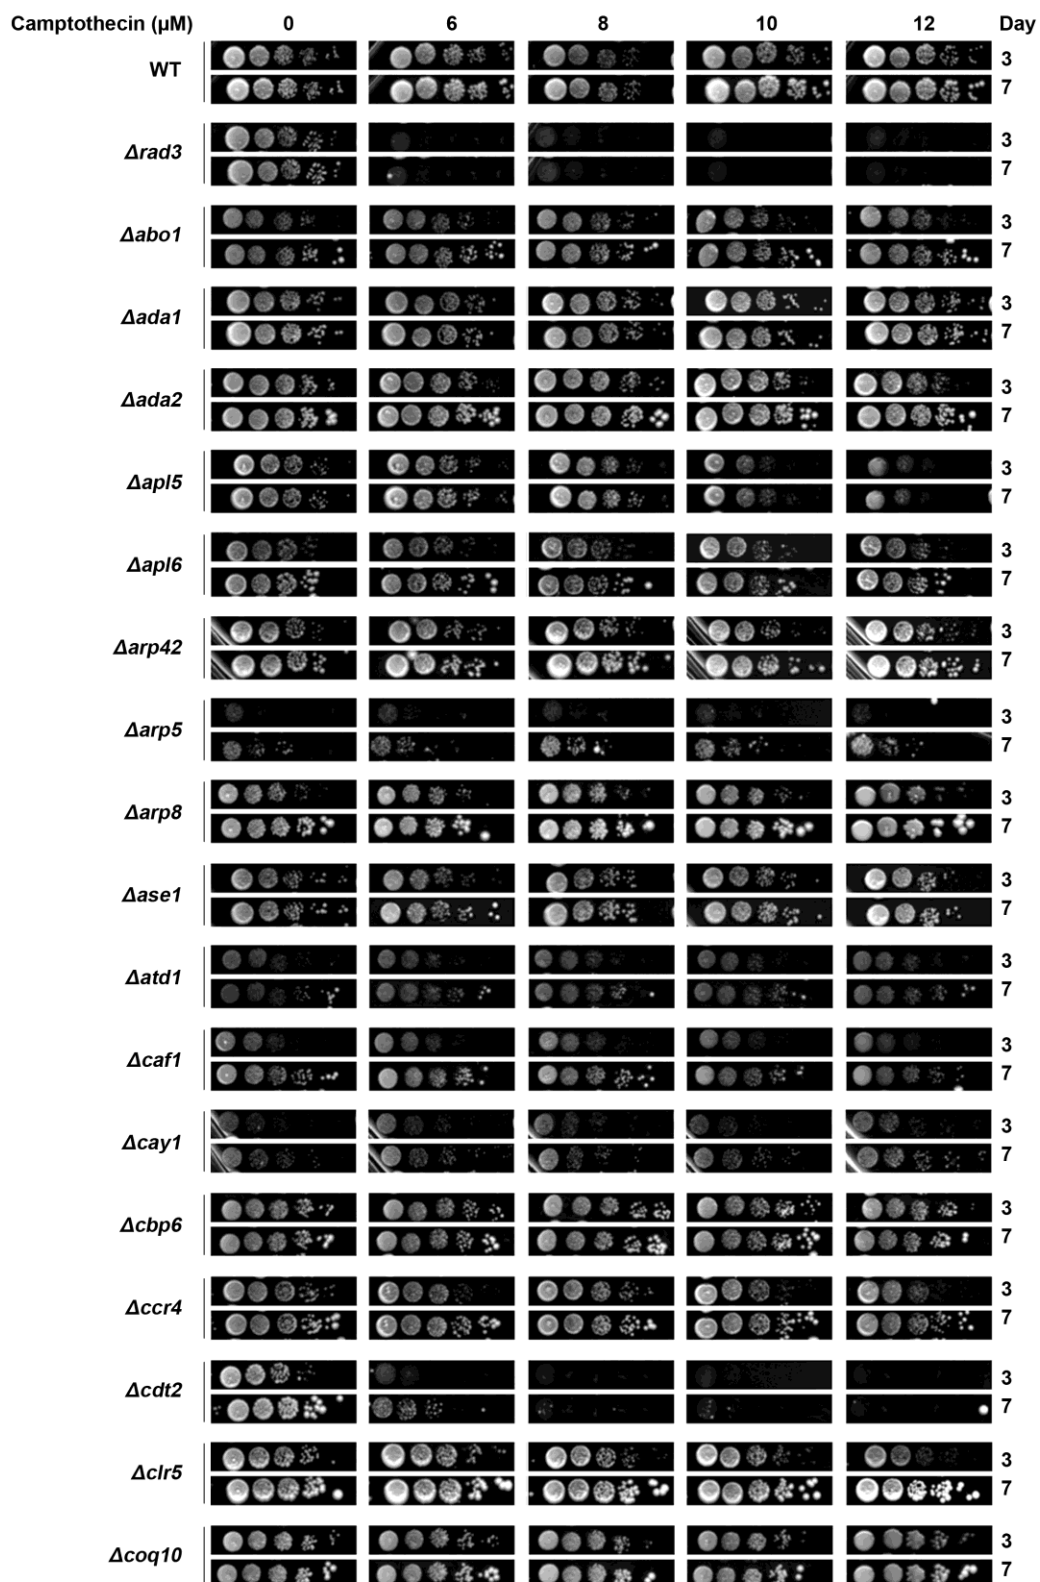

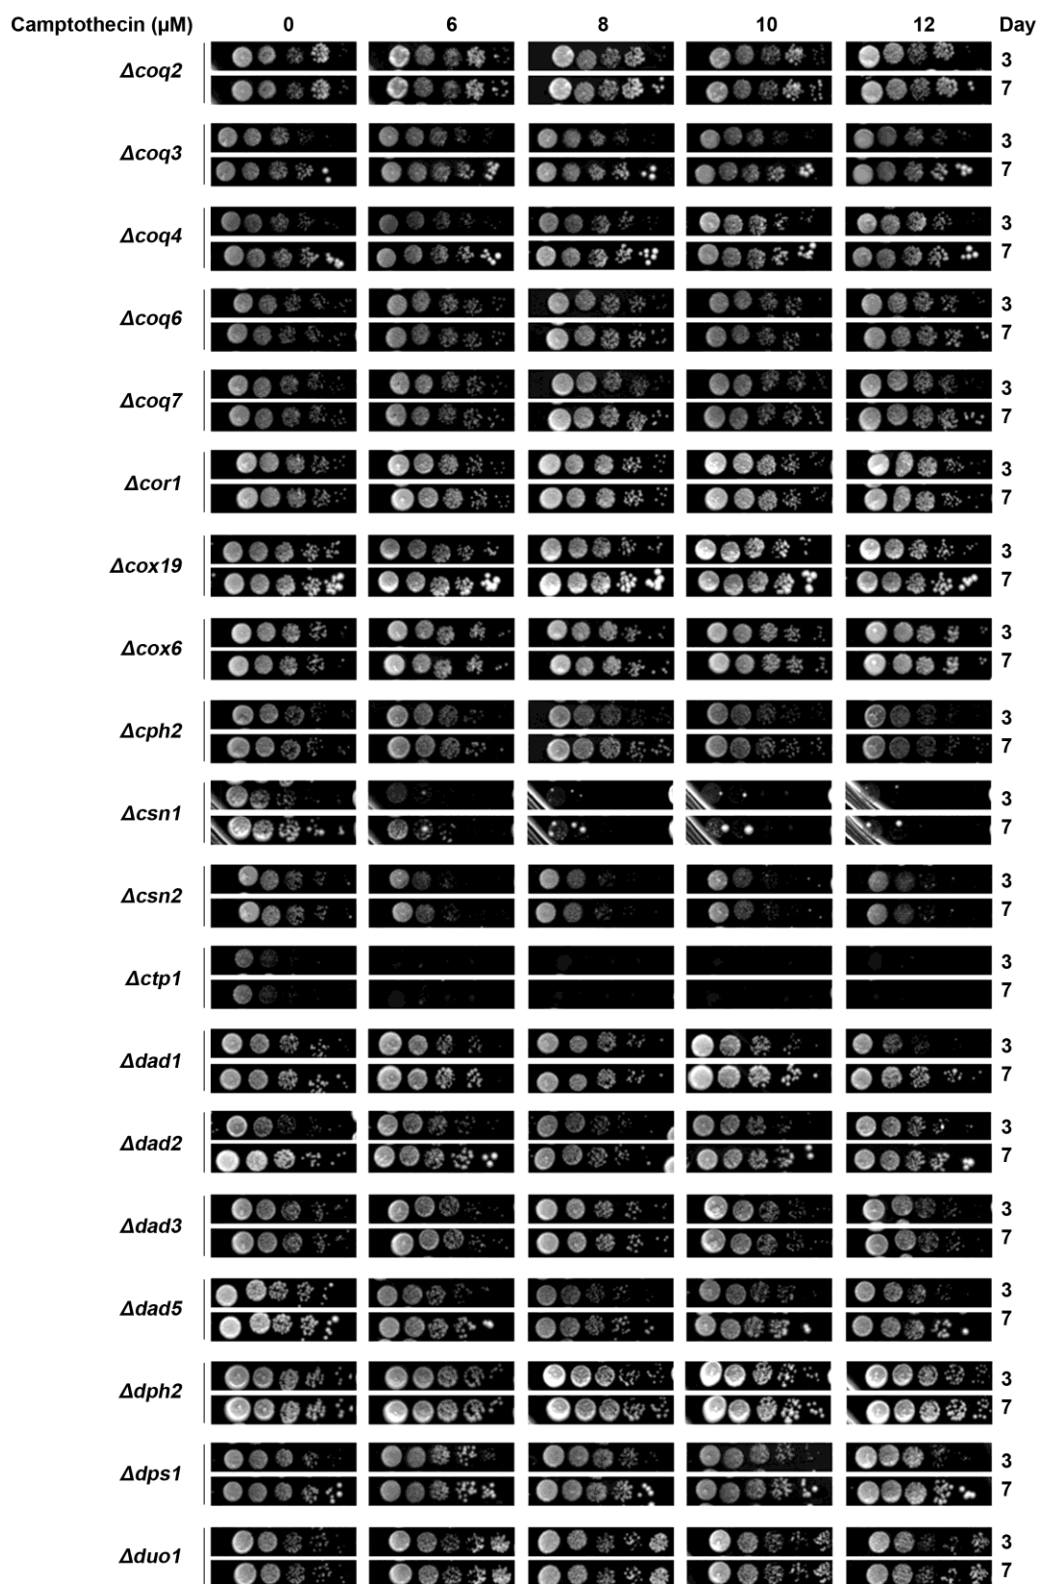



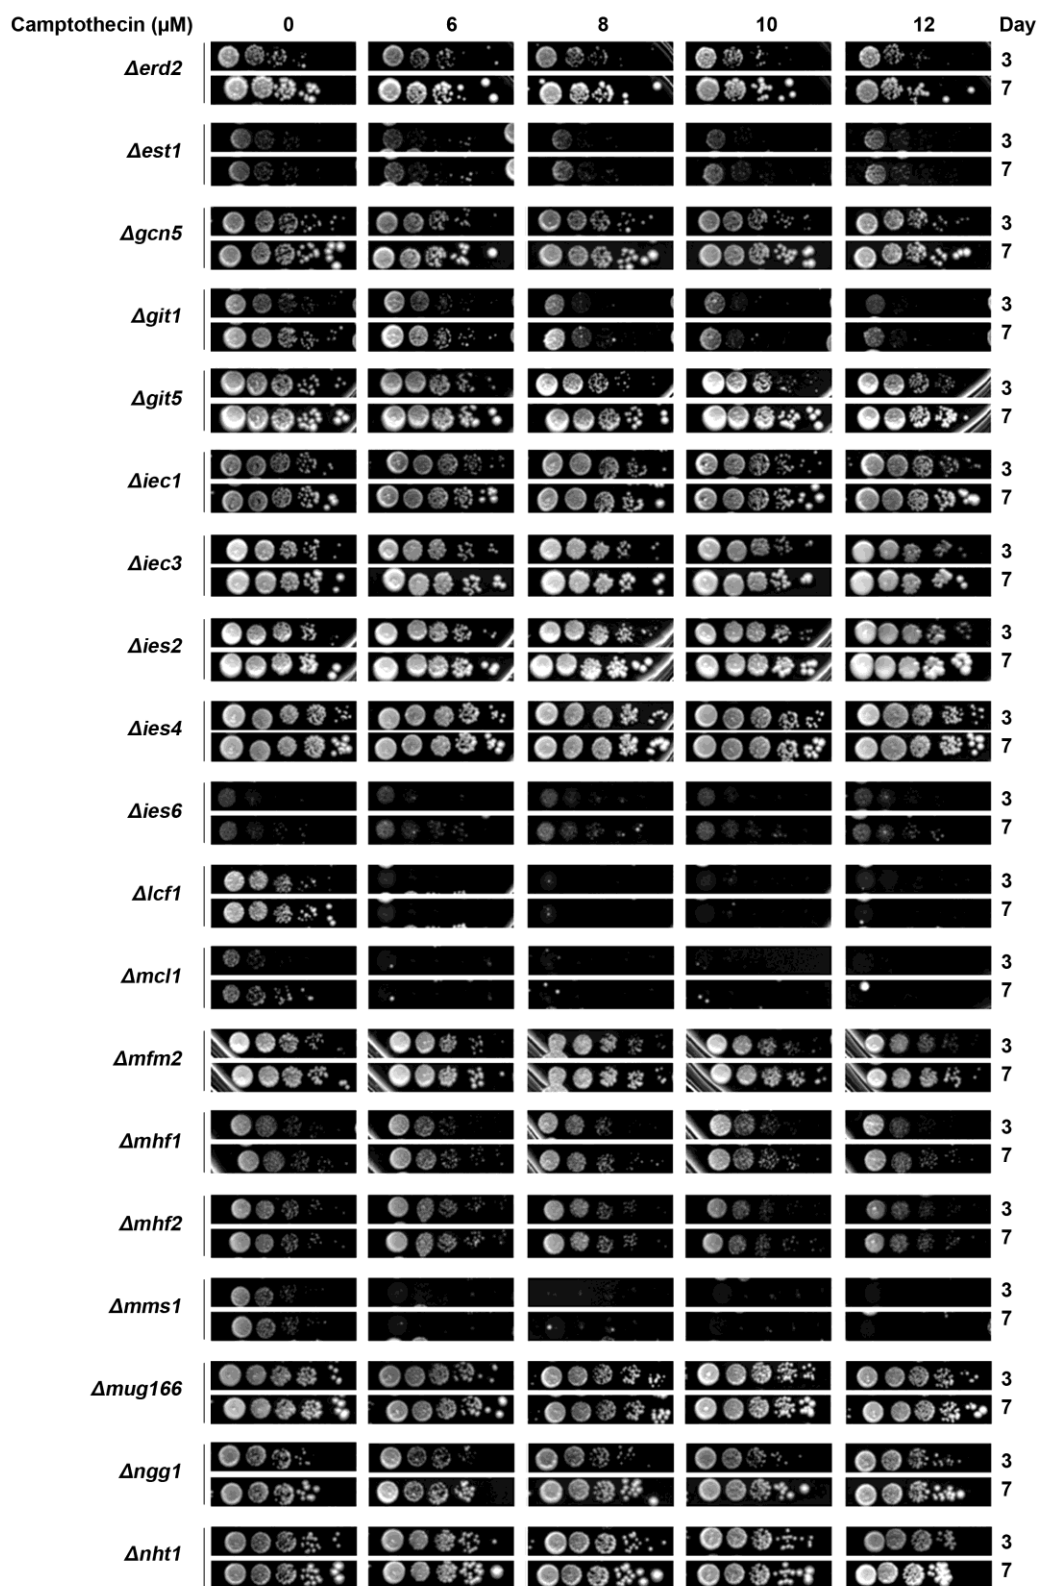

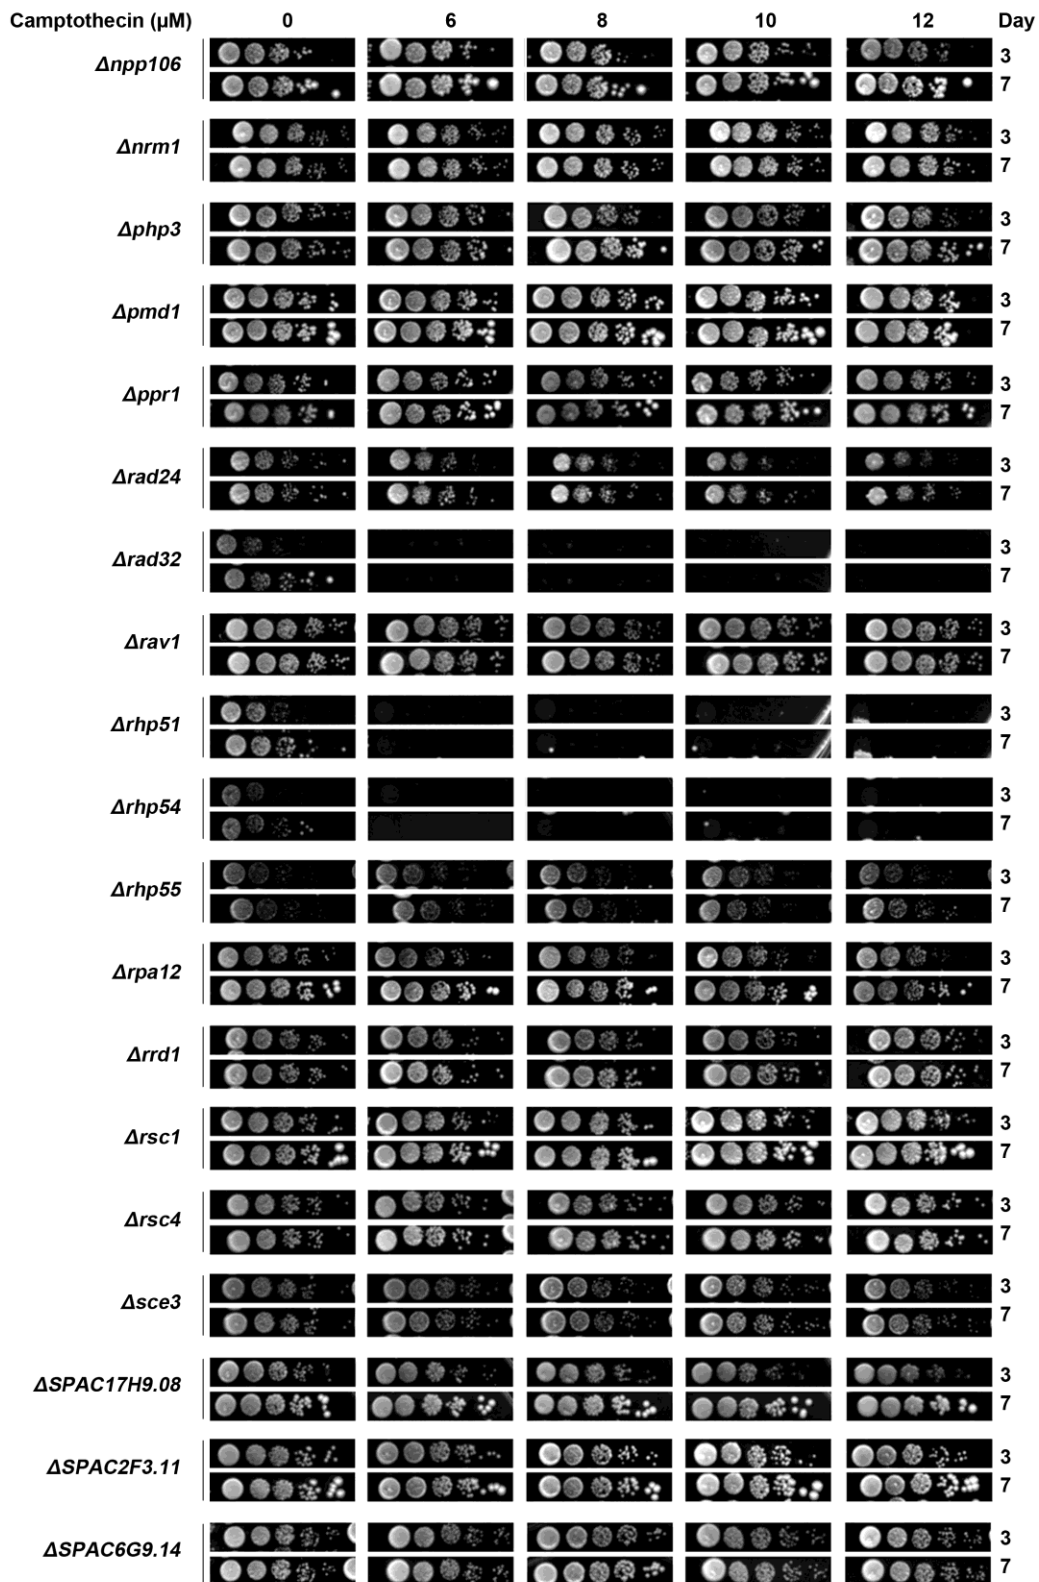

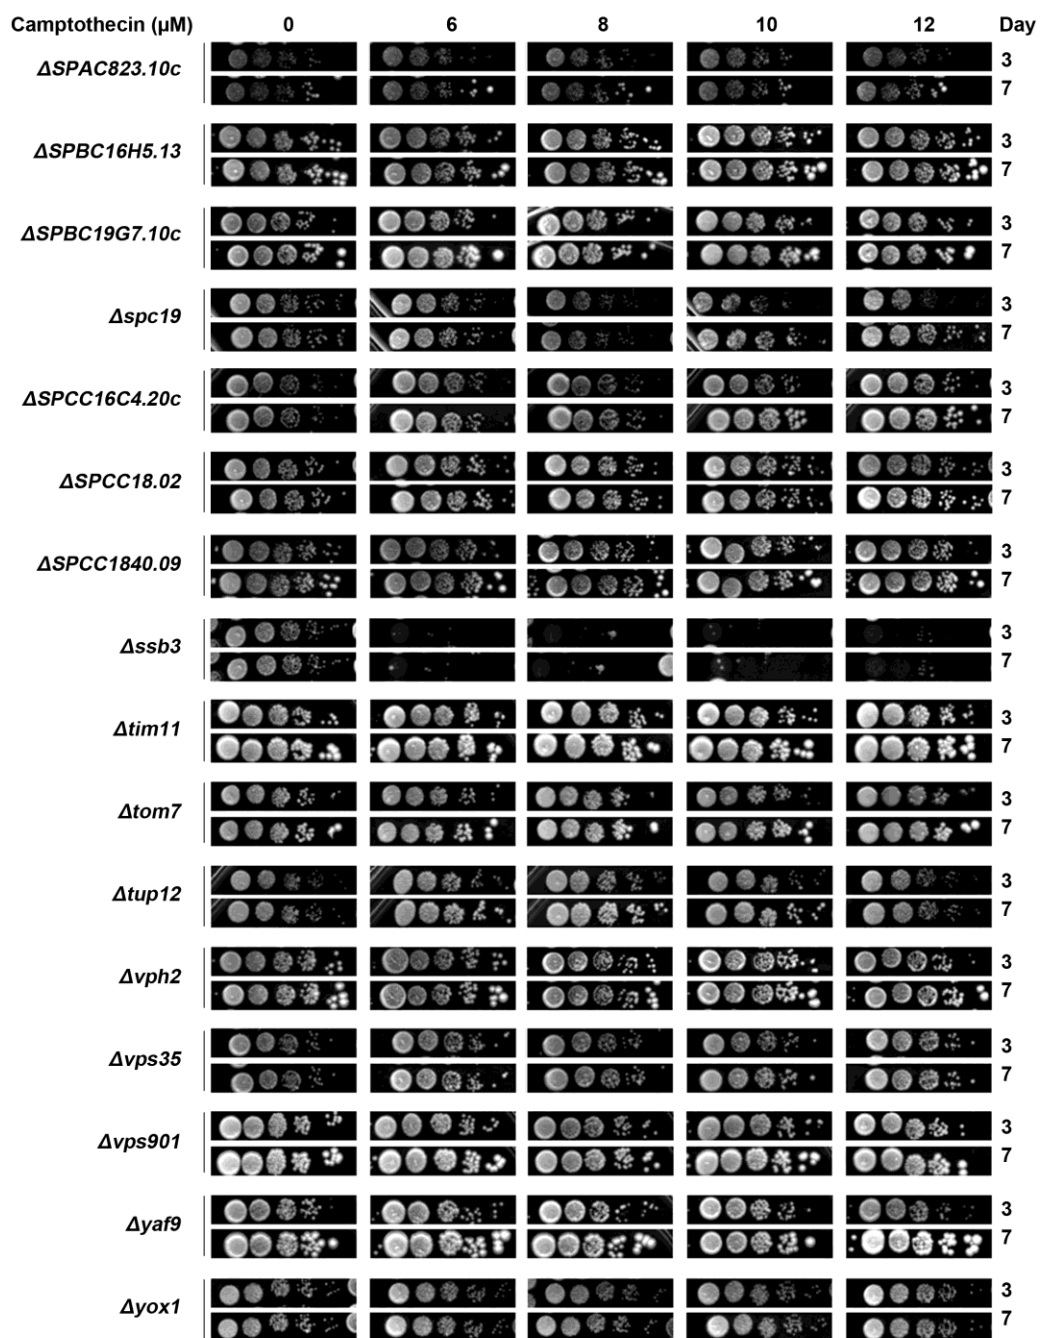

### Supplementary Figure 4

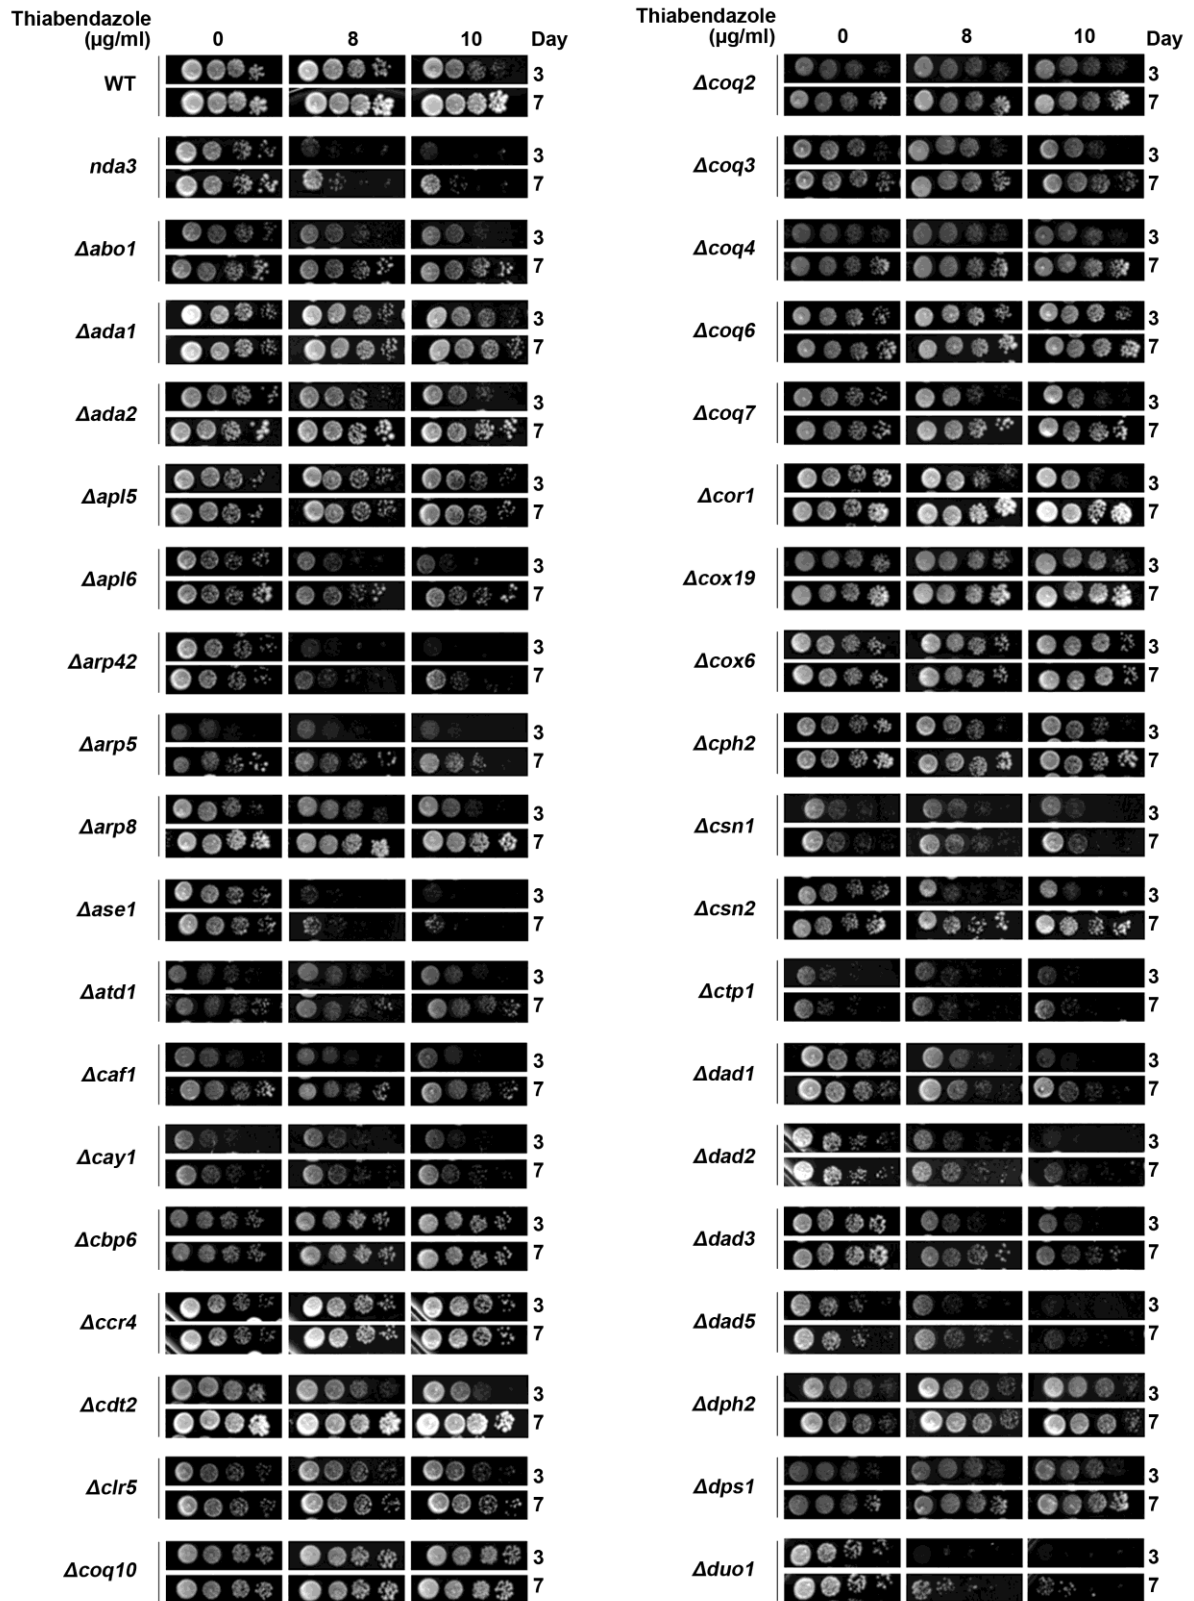

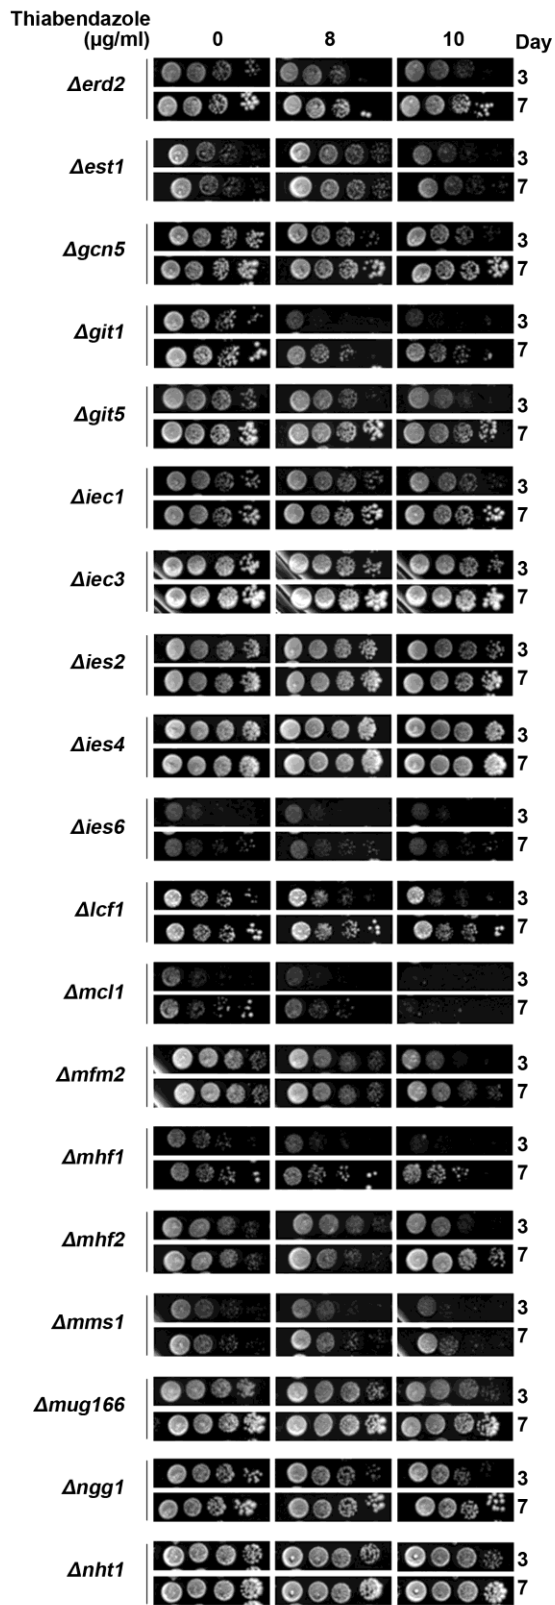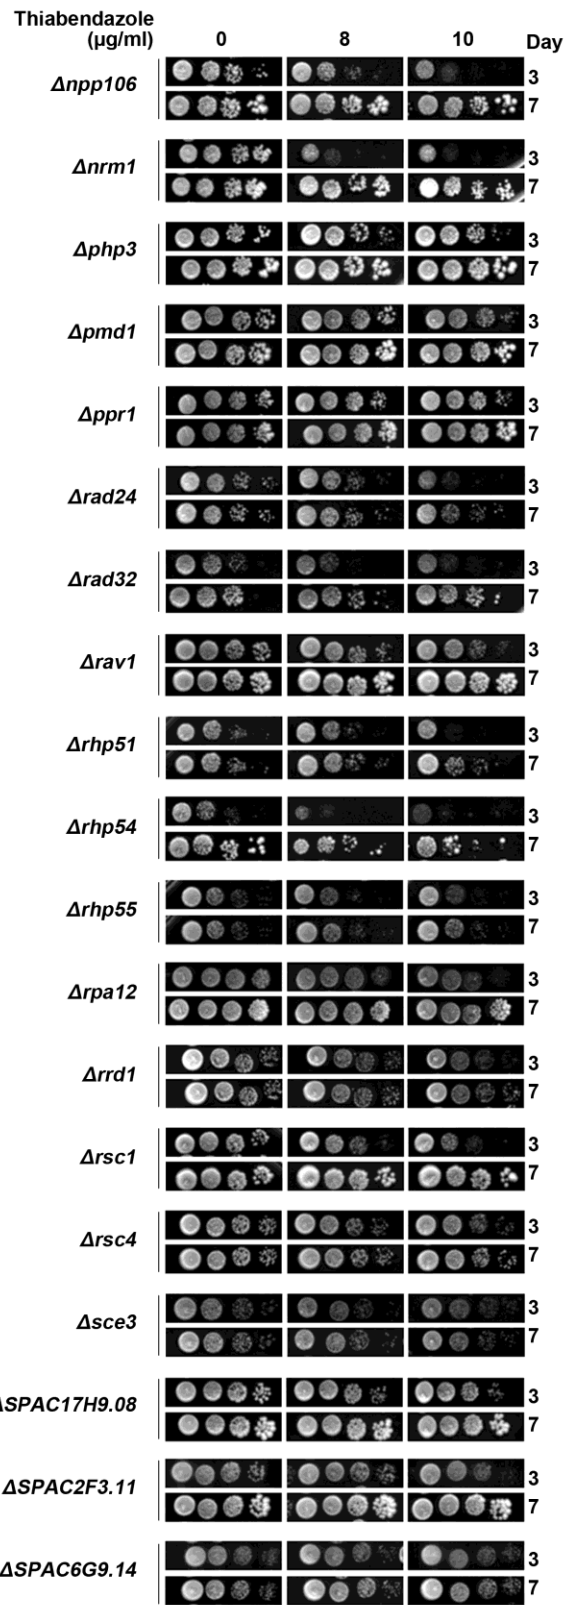

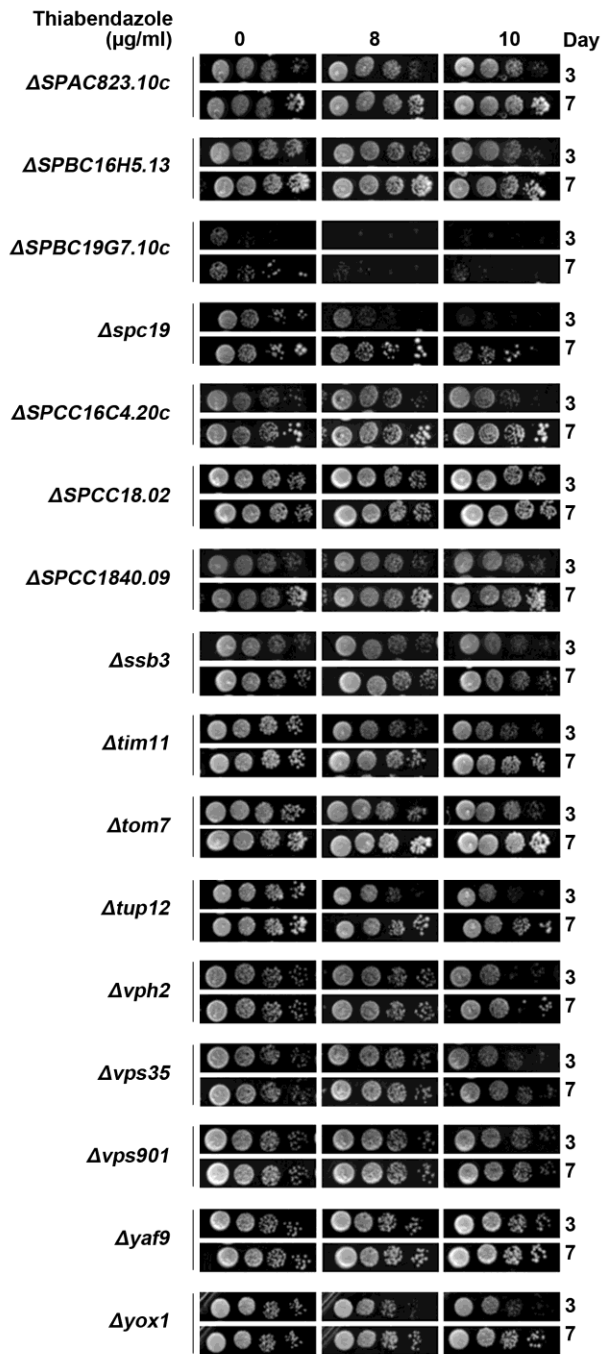

Supplementary Figure 5

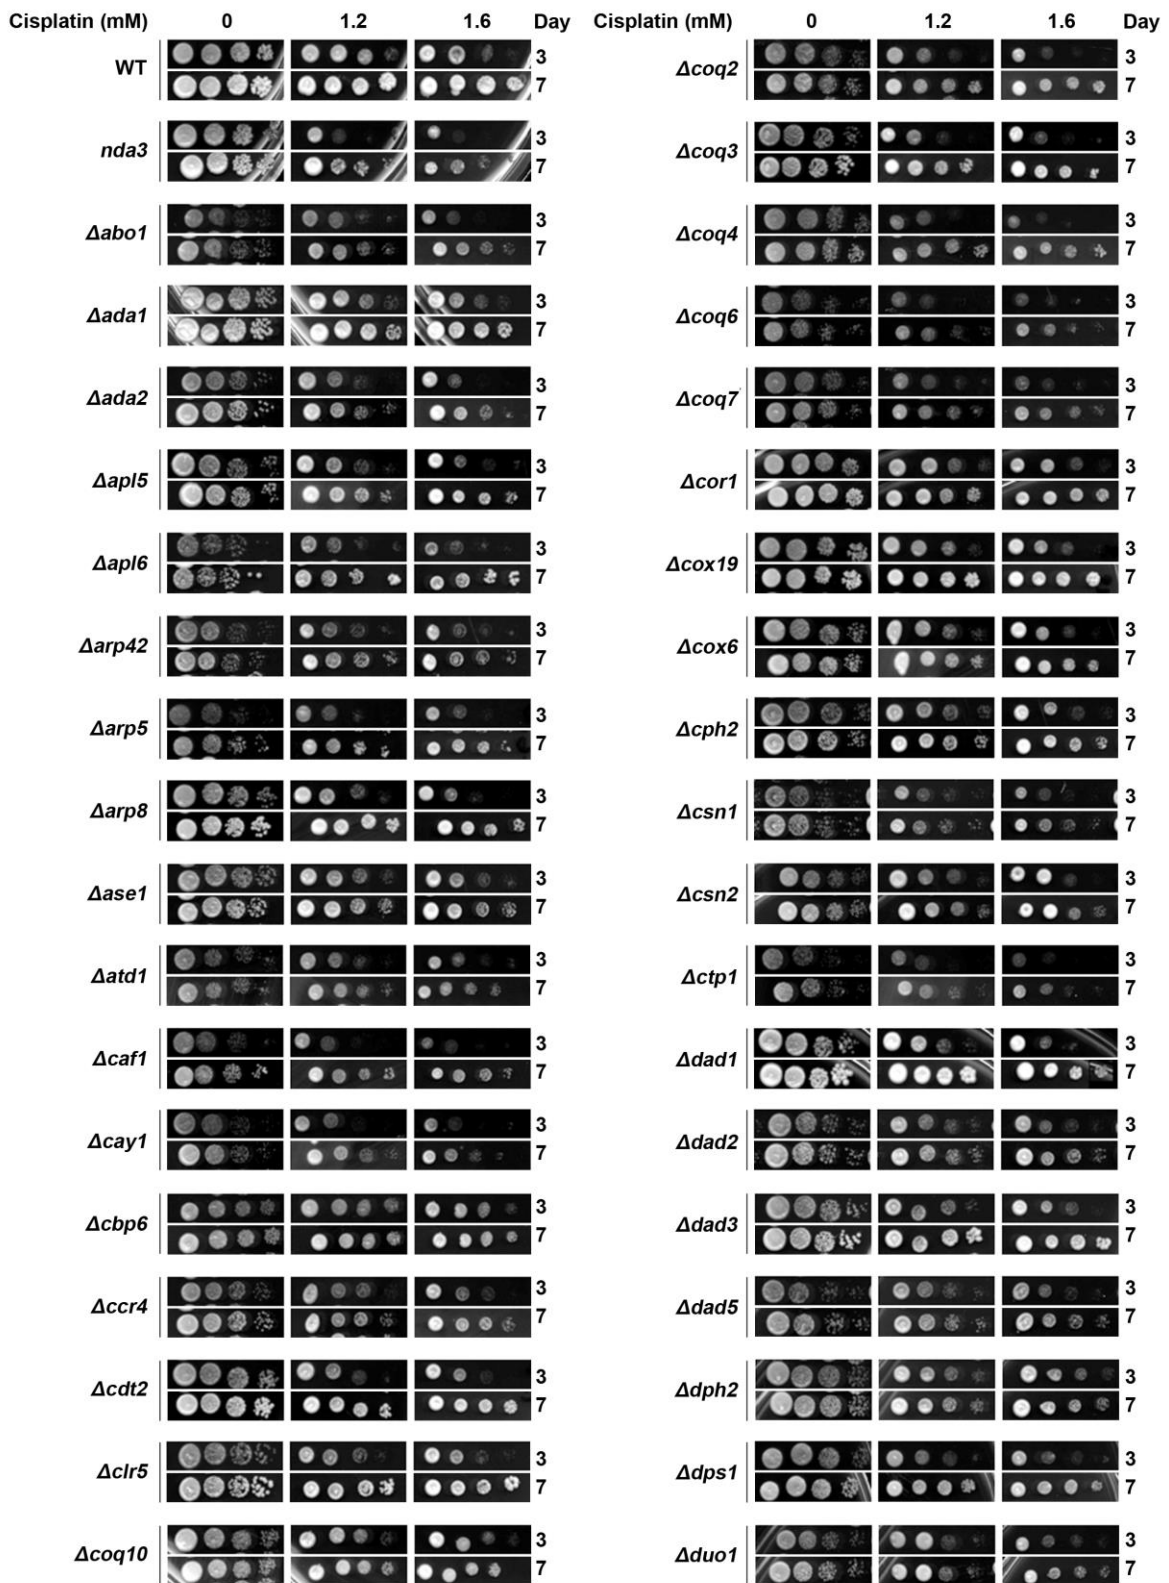

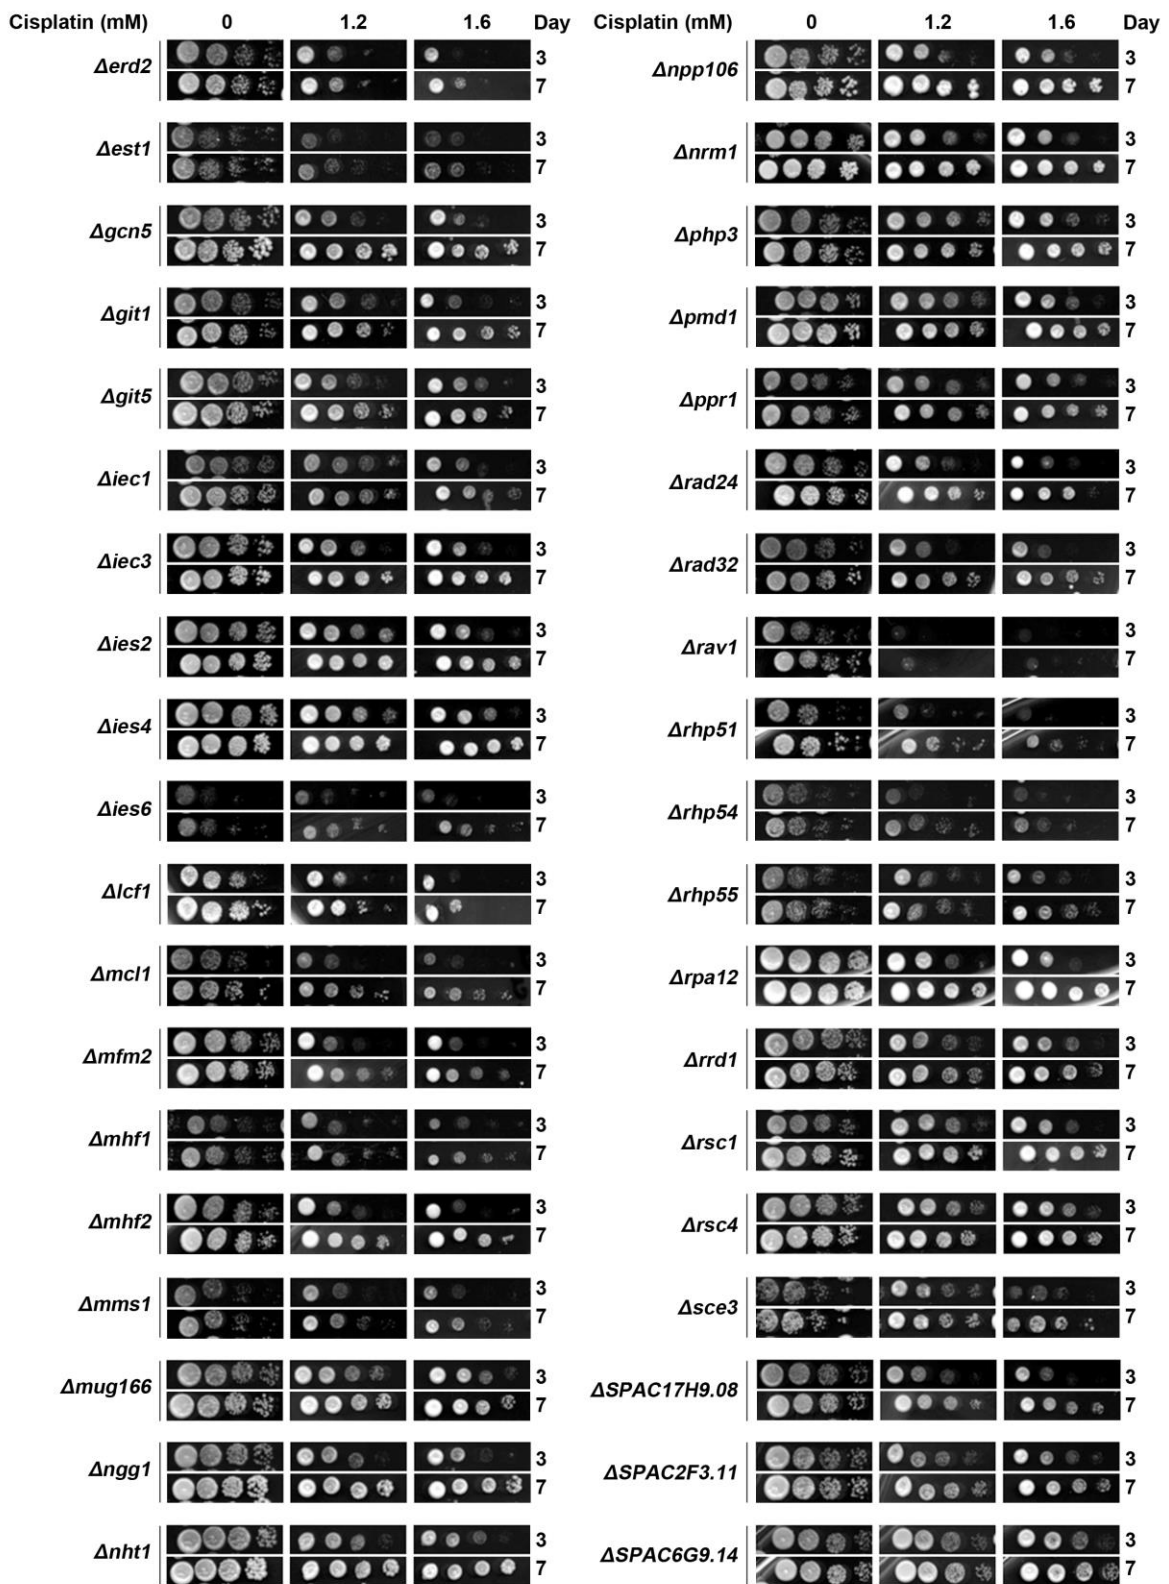



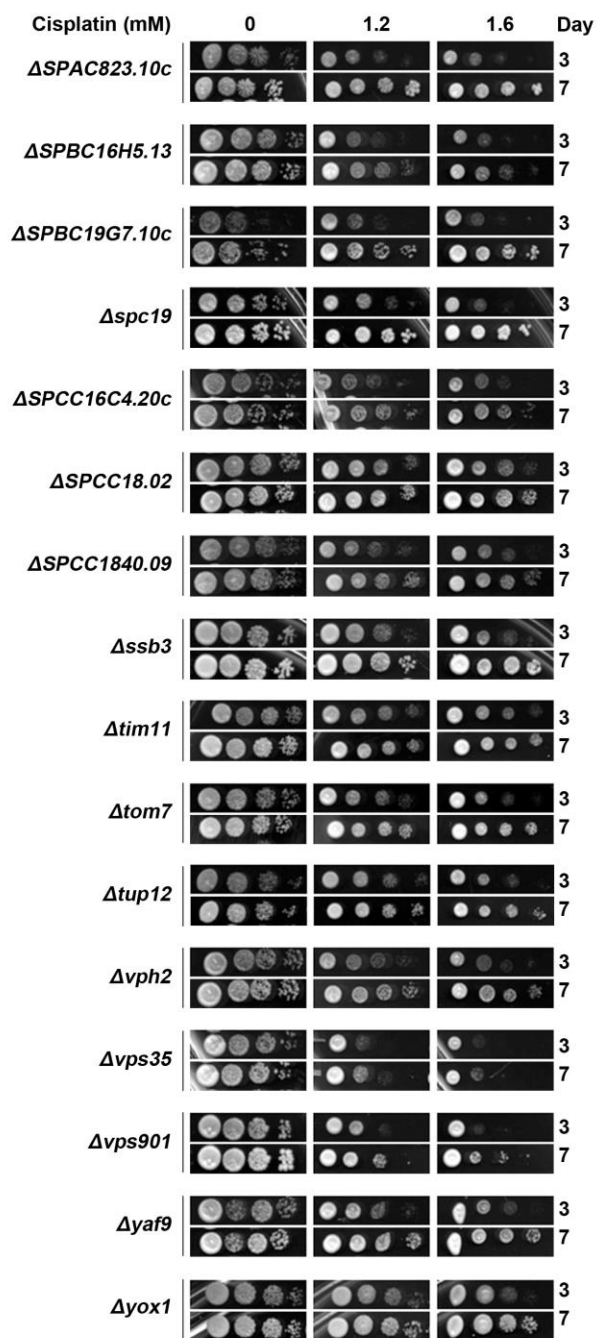

## Supplementary Figure 6

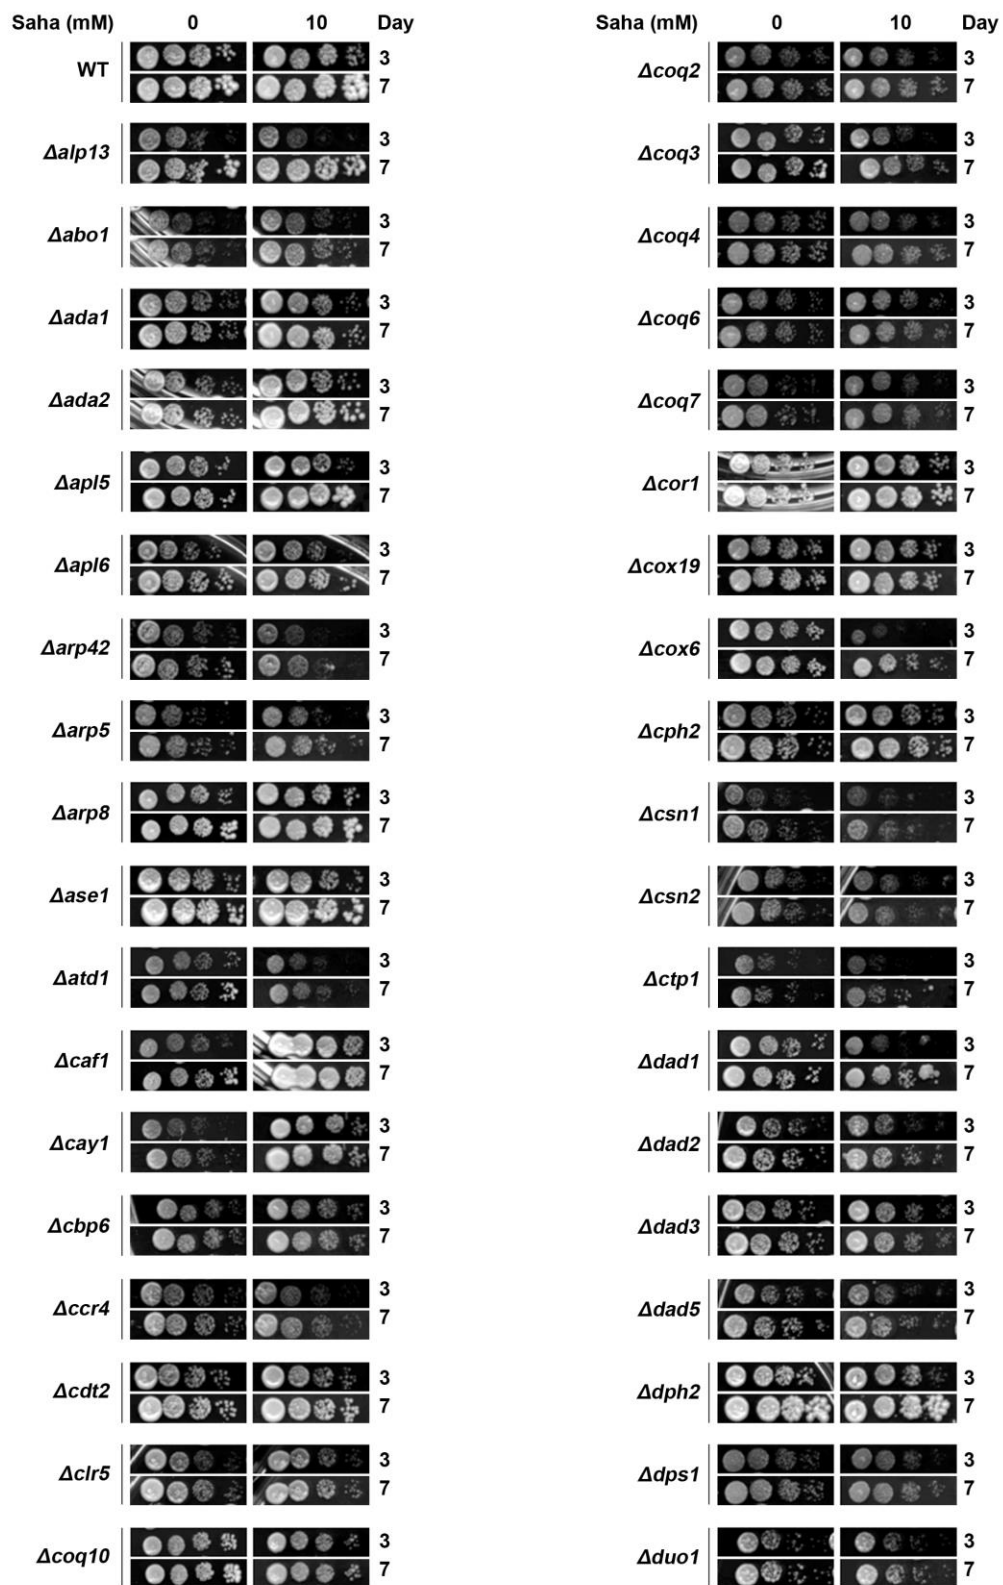

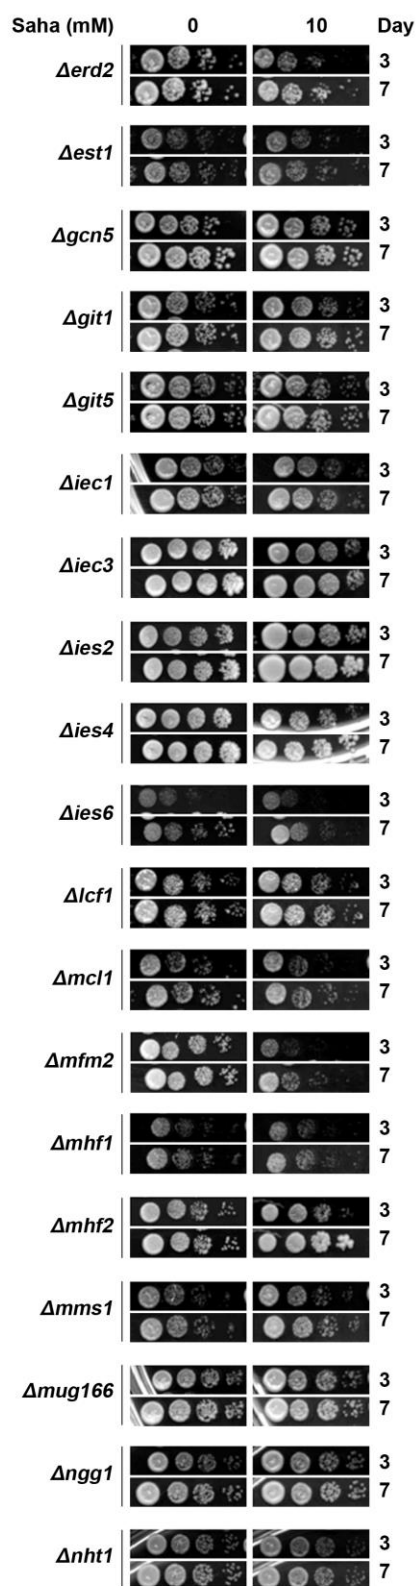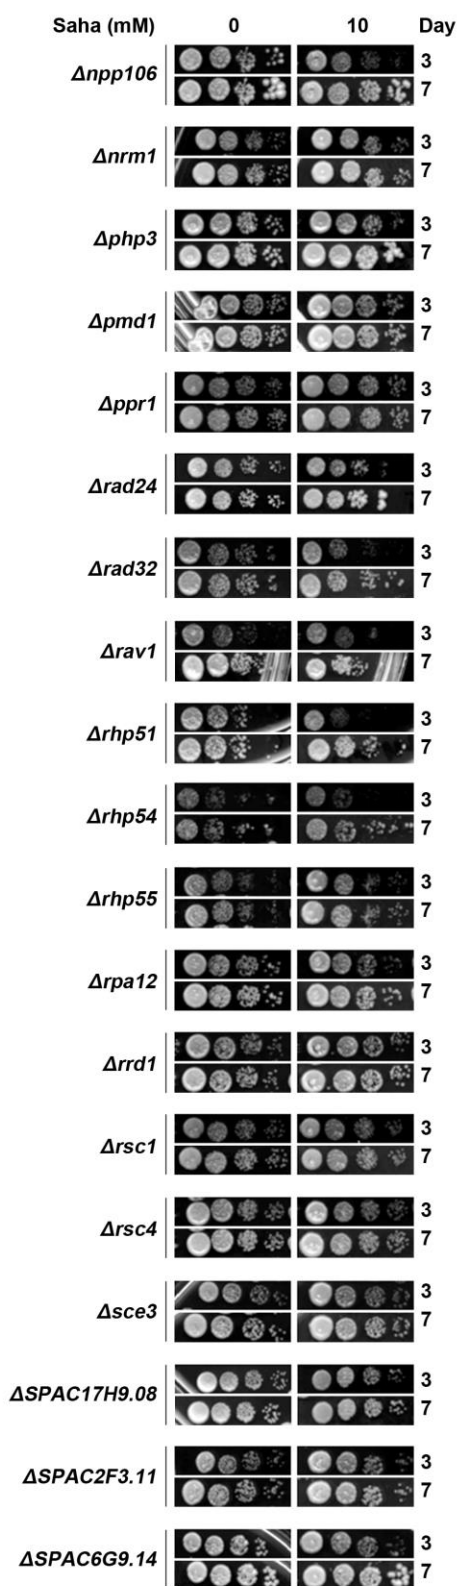

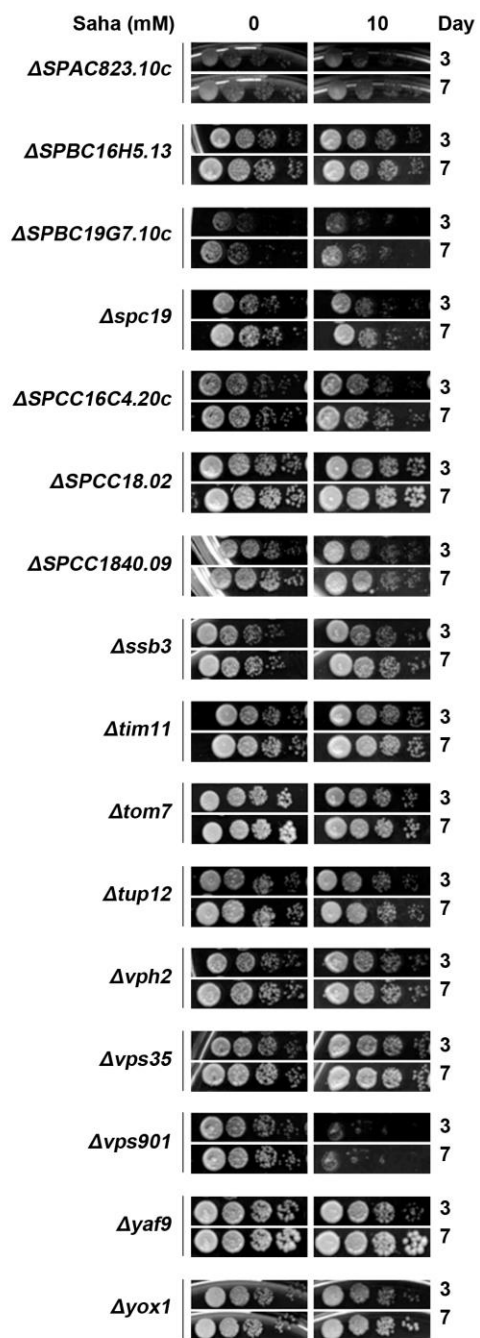

Supplementary Figure 7

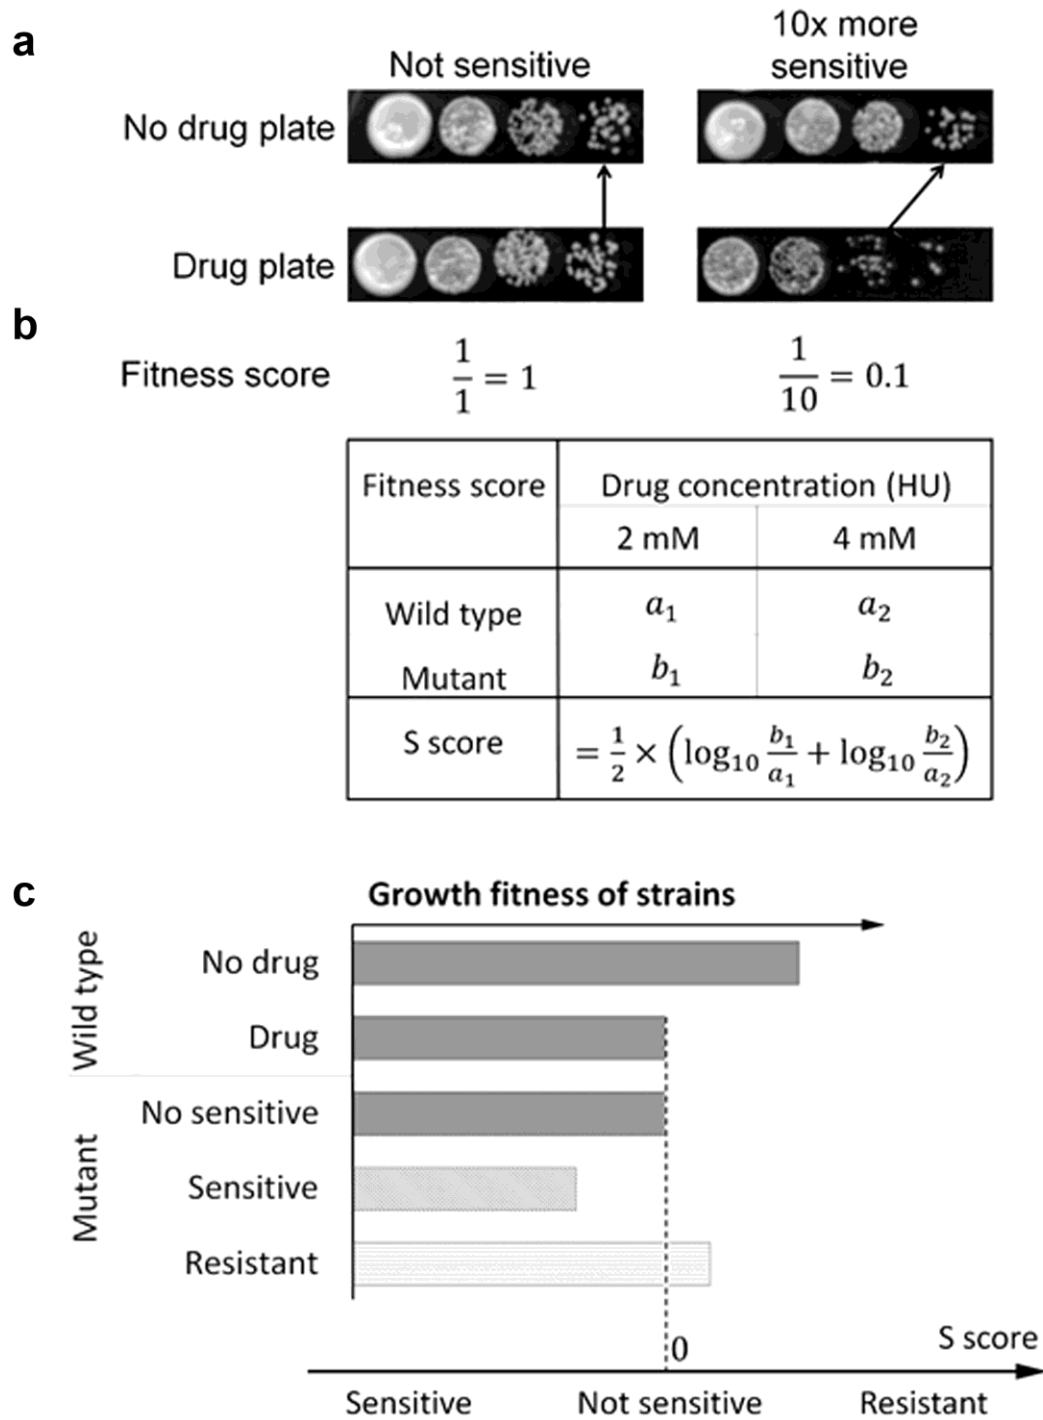

## Supplementary Figure 8

### a Day 3

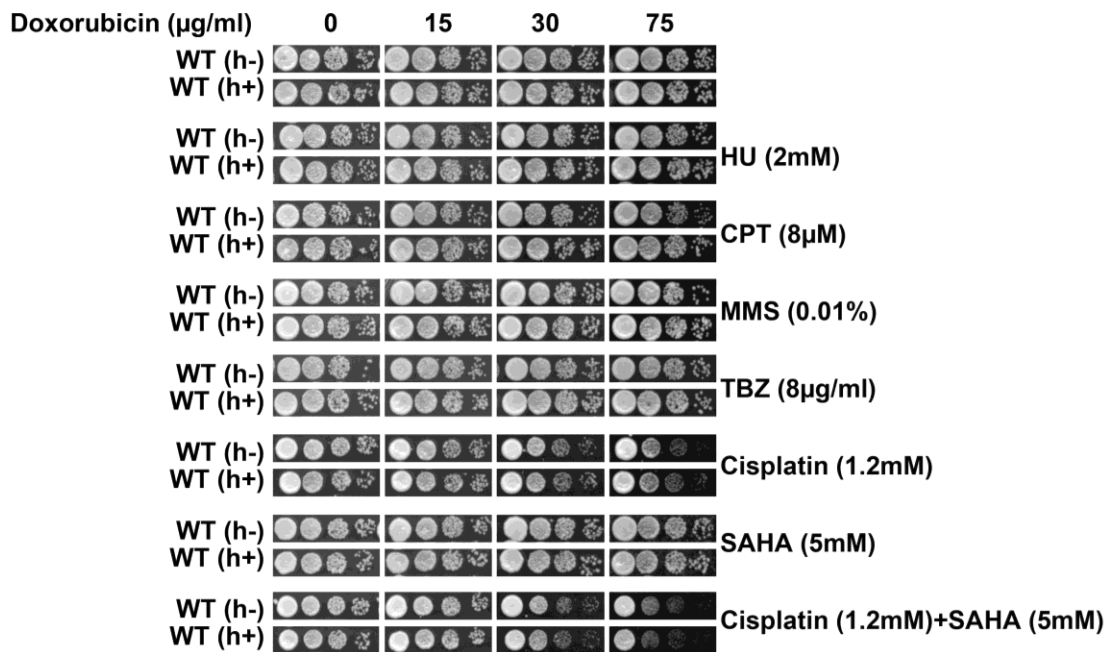

### b Day 7

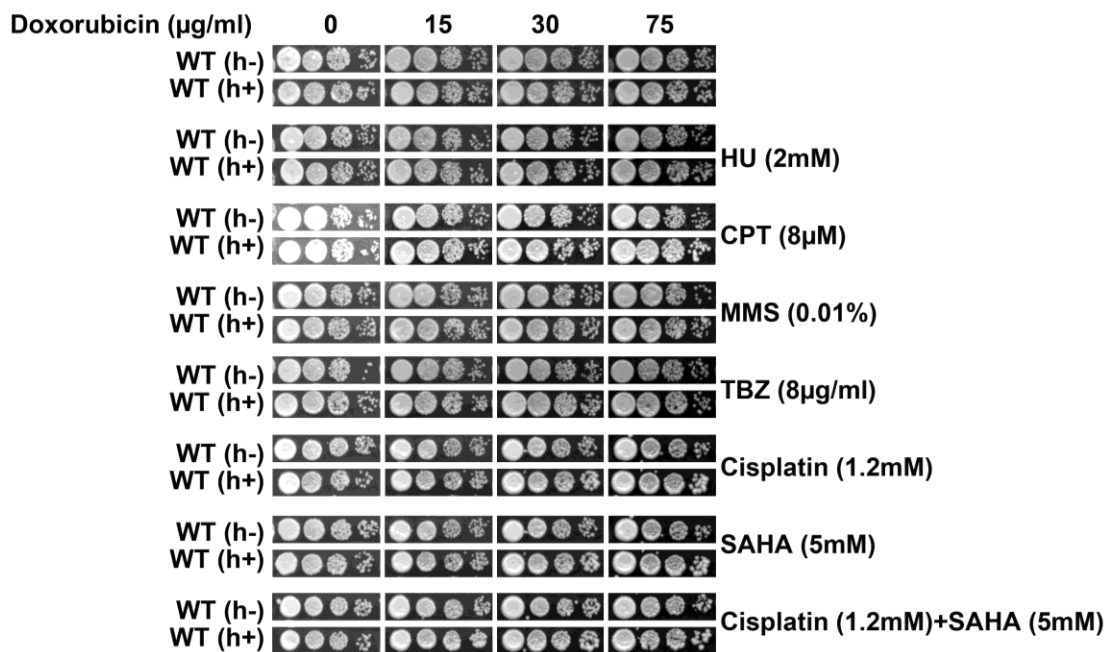

## Supplementary Figure 9

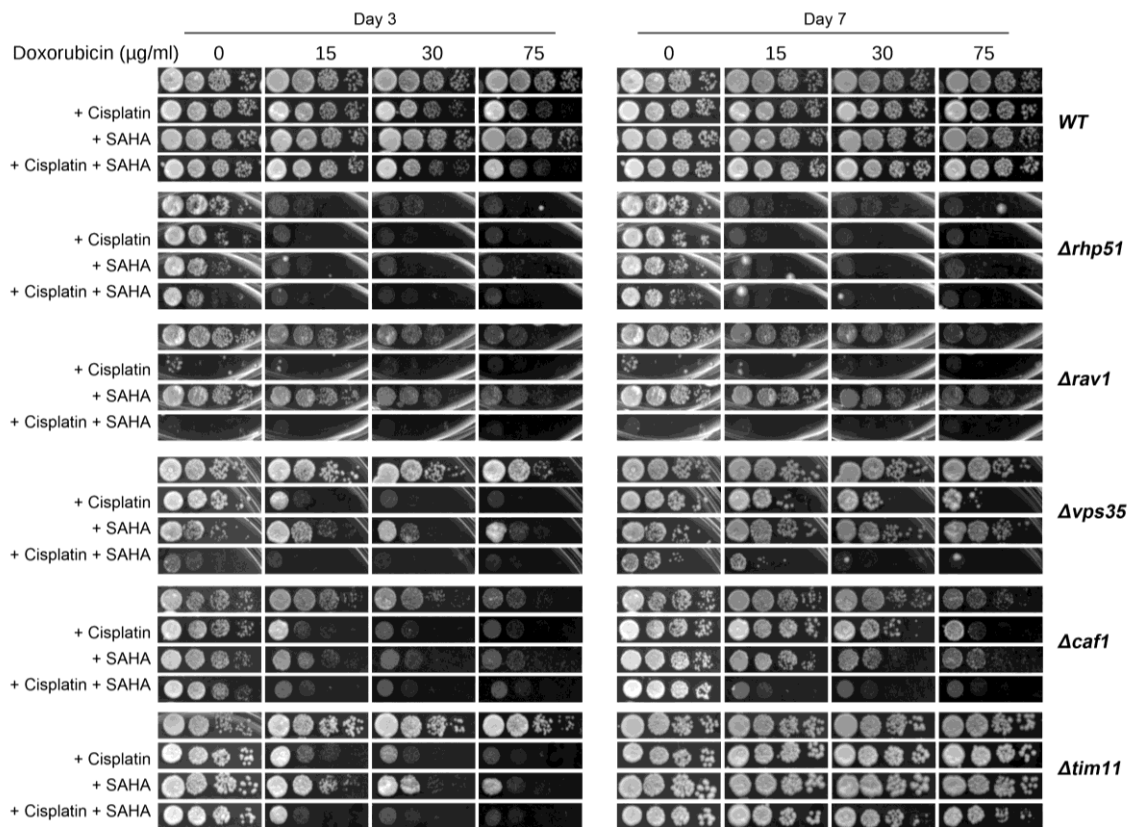

# Supplementary Figure 10

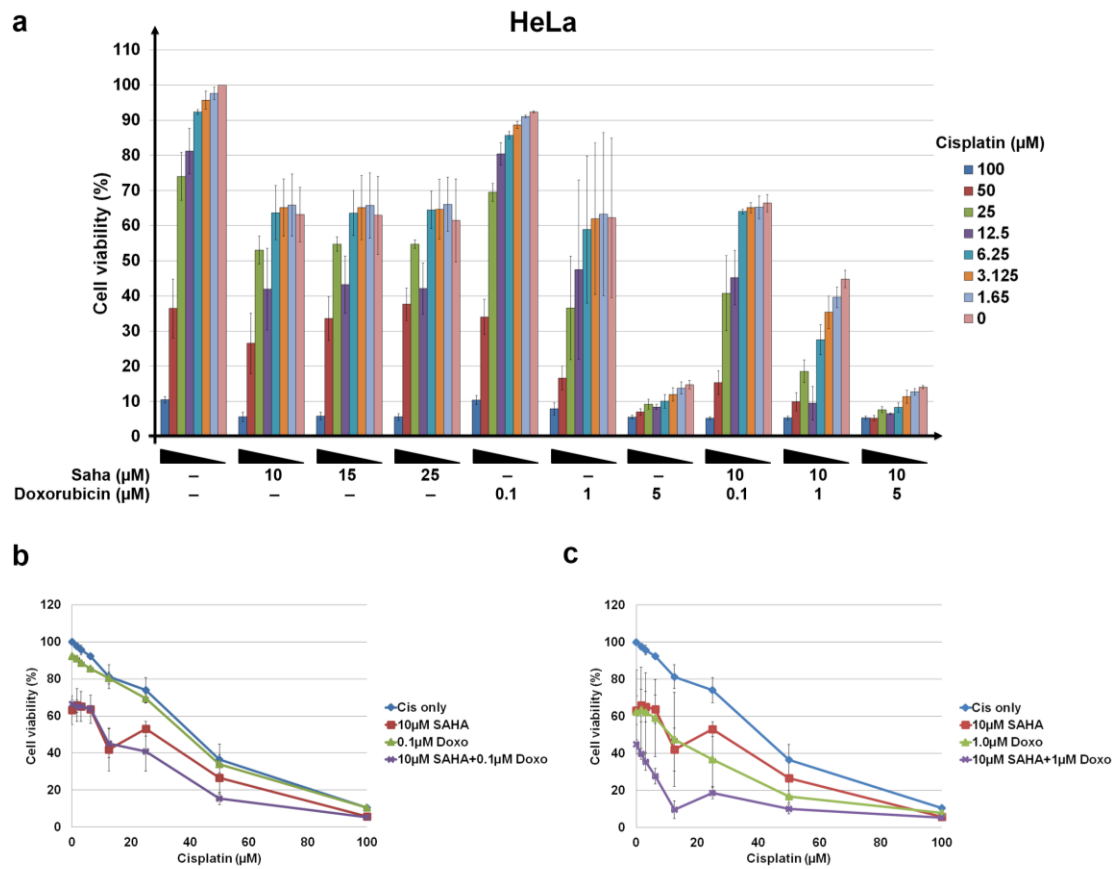



# Supplementary Figure 11

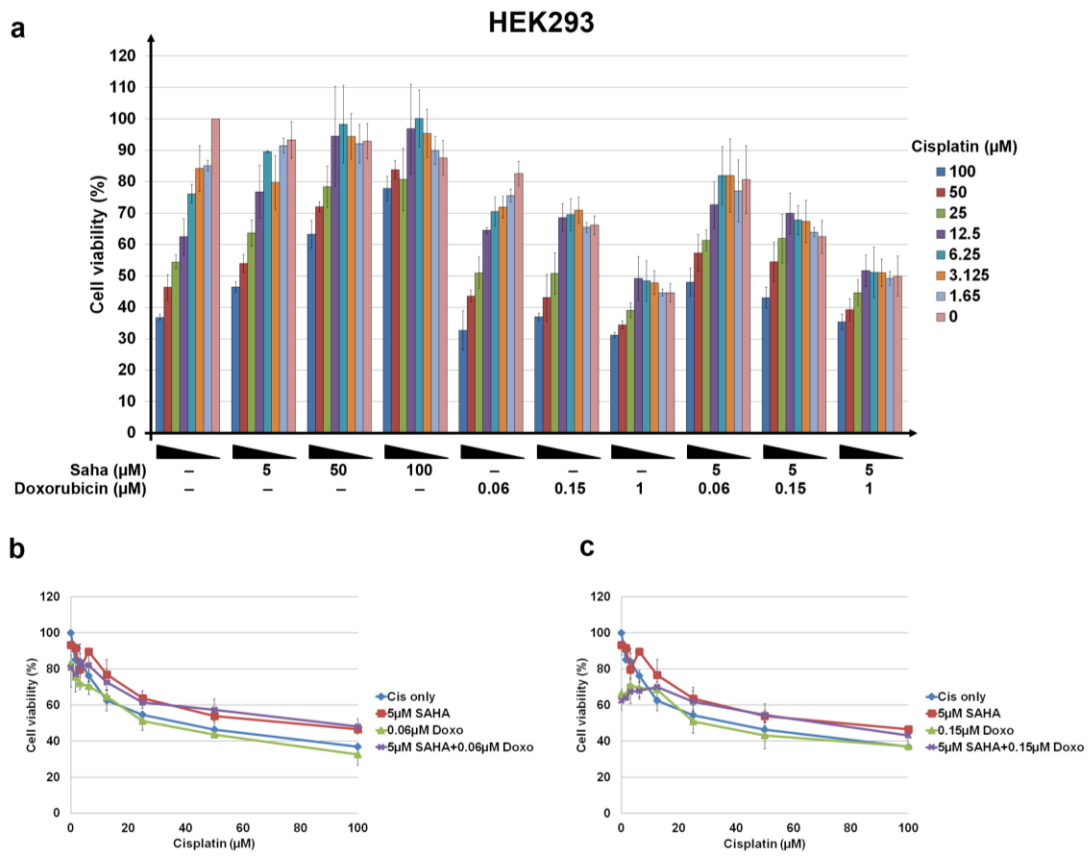

## Supplementary Materials and Methods

### Chemical Synthesis of SAHA

Unless stated otherwise, all non-aqueous reactions were performed in dried, round-bottomed flasks under an inert nitrogen atmosphere. Commercially available, AR-grade dichloromethane (DCM) and methanol (MeOH) were used as received. All reaction temperatures stated in the procedures are external bath temperatures. Commercial reagents were purchased from Sigma-Aldrich or Alfa Aesar, and used as received without further purification, unless otherwise stated. Yields refer to chromatographically and spectroscopically homogeneous materials, unless otherwise stated. Reaction progress was monitored by analytical thin layer chromatography (TLC) with 0.25 mm E. Merck pre-coated silica gel plates (60F-254) used UV light (254 nm) for visualization, and ceric ammonium molybdate or potassium permanganate solutions as developing stains. Flash chromatography was performed on silica gel 60 (0.040 – 0.063 mm) purchased from SiliCycle or Merck.  $^1\text{H}$  NMR and  $^{13}\text{C}$  NMR spectra were recorded on a Bruker AMX400 (400 MHz) NMR spectrometer at ambient atmosphere. The deuterated solvent used was  $\text{CDCl}_3$  unless otherwise stated. Chemical shifts are reported in parts per million (ppm), and residual undeuterated solvent peaks were used as internal references: proton (7.26 ppm for  $\text{CDCl}_3$ , 2.50 ppm for  $\text{DMSO-}d_6$ ), carbon (77.0 ppm for  $\text{CDCl}_3$ , 39.52 ppm for  $\text{DMSO-}d_6$ ).  $^1\text{H}$  NMR coupling constants ( $J$ ) are reported in Hertz (Hz), and multiplicities are presented as follows: s (singlet), d (doublet), t (triplet), m (multiplet), dd (doublet of doublet), and br (broad). Low resolution mass spectra were obtained on an Agilent 6130B Quadrupole LC/MS in ESI mode.

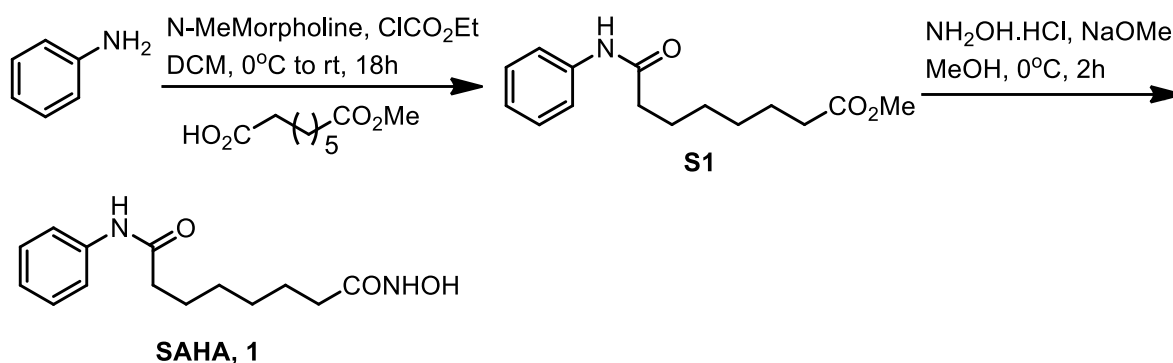

1.5 ml (8.53 mmol) of monomethyl suberate was dissolved in 30 ml of DCM and cooled to 0°C. 1.2 ml (10.9 mmol, 1.3eq.) of N-methylmorpholine and 1.0 ml (10.5 mmol, 1.2eq.) of ethyl chloroformate was added to the solution at 0°C and stirred for 15 min at 0°C. 1.0 ml (11.0mmol, 1.3eq.) of aniline was added at 0°C and the solution was allowed to warm to room temperature over 18 h. The reaction was quenched by the addition of saturated sodium bicarbonate to the solution. The mixture was extracted with DCM 3 times. The combined organic layer was washed with brine solution and dried with anhydrous sodium sulfate. The organic layer was concentrated and purified by column chromatography using 4:1 to 3:2 to 1:1 Hex/EtOAc to obtain 2.00 g (89%) of the amide as a brown solid. TLC (3:2 Hex/EtOAc)  $R_f = 0.31$ ; ESI M+1 263.2

$^1\text{H}$  NMR 8.23 (br. s., 1 H), 7.54 (d,  $J = 7.8$  Hz, 2 H), 7.27 (t,  $J = 7.8$  Hz, 2 H), 7.09 - 7.03 (m, 1 H), 3.65 (s, 3 H), 2.31 (td,  $J = 7.5, 17.1$  Hz, 4 H), 1.74 - 1.64 (m, 2 H), 1.60 (quin,  $J = 7.3$  Hz, 2 H), 1.37 - 1.28 (m, 4 H).

$^{13}\text{C}$  NMR 174.2, 171.8, 138.1, 128.7, 123.9, 119.9, 51.3, 37.2, 33.8, 28.6, 28.6, 25.3, 24.5.

2.00 g (7.61 mmol) of amide **A1** was dissolved in 20 ml of methanol and cooled to 0°C. 2.68 g (38.5 mmol, 5.1eq.) of hydroxylamine hydrochloride salt and 15.0 ml (78.7 mmol, 10.3eq.) of 30% sodium methoxide solution in methanol was added to the solution. The reaction mixture was stirred for 2 h at 0°C and then quenched with 20 ml of 4 M hydrochloric acid. The mixture was concentrated to remove methanol. The resultant precipitate was

filtered and recrystallized from methanol and water to obtain 1.66 g (82%, 74% over 2 steps) of SAHA, **1**, as an off-white crystalline solid. ESI M+1 265.2

$^1\text{H}$  NMR (DMSO- $d_6$ ) 10.32 (br. s., 1 H), 9.83 (s, 1 H), 8.65 (br. s., 1 H), 7.58 (d,  $J = 7.5$  Hz, 2 H), 7.33 - 7.23 (m, 2 H), 7.06 - 6.97 (m, 1 H), 2.28 (t,  $J = 7.5$  Hz, 2 H), 1.94 (t,  $J = 7.4$  Hz, 2 H), 1.64 - 1.43 (m, 4 H), 1.35 - 1.20 (m, 4 H).

$^{13}\text{C}$  NMR (DMSO- $d_6$ )  $\delta = 171.2, 169.1, 139.3, 128.6, 122.9, 119.0, 36.4, 32.2, 28.4, 25.0$ .
